# Supplementary material for: Electrochemical oxidative thiocyanation and amination of enaminones towards the synthesis of multi-substituted alkenes
Source: Royal Society of Chemistry journal article supplement (doi:10.1039/d0gc03590d), 2020-12-11

# Supporting Information

## Electrochemical oxidative thiocyanation and amination of enaminones towards the synthesis of multi-substituted alkenes

Fangling Lu,<sup>†a</sup> Kan Zhang,<sup>†a</sup> Yanxiu Yao,<sup>a</sup> Ying Yin,<sup>b</sup> Jiafu Chen,<sup>b</sup> Xinwei Zhang,<sup>b</sup> Ying Wang,<sup>b</sup>  
Ziwei Gao,<sup>\*a</sup> Lijun Lu,<sup>\*c</sup> Aiwen Lei<sup>\*b,c</sup>

<sup>a</sup> College of Chemistry and Chemical Engineering, Shaanxi Normal University, Xi'an, 710119,  
P.R.China

<sup>b</sup> National Research Center for Carbohydrate Synthesis, Jiangxi Province's Key Laboratory of  
Chemical Biology, Jiangxi Normal University, Nanchang 330022, P. R. China

<sup>c</sup> College of Chemistry and Molecular Sciences, the Institute for Advanced Studies (IAS), Wuhan  
University, Wuhan, Hubei 430072, P. R. China

<sup>†</sup>Fangling Lu and Kan Zhang contributed equally to this work.

## Table of Contents

|                                                                                      |     |
|--------------------------------------------------------------------------------------|-----|
| General information.....                                                             | S3  |
| Experimental procedure.....                                                          | S4  |
| Detail descriptions for products.....                                                | S6  |
| References.....                                                                      | S13 |
| Copies of $^1\text{H}$ NMR, $^{13}\text{C}$ NMR and $^{19}\text{F}$ NMR spectra..... | S14 |

## General information

Unless otherwise noted, materials were obtained from commercial suppliers and used without further purification. The instrument for electrolysis was dual display potentiostat (DJS-292B) (made in China). The anodic electrode was graphite rod ( $\phi$  6 mm) and cathodic electrode was platinum plate (15 mm $\times$ 15 mm $\times$ 0.3 mm). Thin layer chromatography (TLC) employed glass 0.25 mm silica gel plates. Flash chromatography columns were packed with 300-400 mesh silica gel in petroleum (boiling point was between 60-90 °C). Gradient flash chromatography was conducted eluting with a continuous gradient from petroleum to the indicated solvent, and they were listed as volume/volume ratios. NMR spectra were recorded on a Bruker spectrometer at 400 MHz ( $^1\text{H}$  NMR), 101 MHz ( $^{13}\text{C}$  NMR), 376 MHz ( $^{19}\text{F}$  NMR). Chemical shifts were reported relative to tetramethylsilane, dimethyl sulfoxide (2.50 ppm for  $^1\text{H}$ , 39.6 ppm for  $^{13}\text{C}$ ), respectively. And all  $^1\text{H}$ ,  $^{13}\text{C}$  and  $^{19}\text{F}$  NMR data spectra were reported in delta ( $\delta$ ) units, parts per million (ppm) downfield from the internal standard. Coupling constants were reported in Hertz (Hz). GC-MS spectra were recorded on a Shimadzu GC-MS QP2010 Ultra.

## Experimental procedure

### General procedure for the preparation of 3:

In an oven-dried undivided three-necked bottle (25 mL) equipped with a stir bar, enaminones **1** (0.5 mmol), ammonium thiocyanate **2a** (3.5 mmol, 266.4 mg), MeCN/HFIP/H<sub>2</sub>O (11 mL, v/v/v = 9/1/1) was added. The bottle was equipped with graphite rod ( $\phi$  6 mm, about 15 mm immersion depth in solution) as the anode and platinum plate (15 mm $\times$ 15 mm $\times$ 0.3 mm) as the cathode. The reaction mixture was stirred and electrolyzed at a constant current of 18 mA under N<sub>2</sub> atmosphere at room temperature for 4 h. After completion of the reaction, as indicated by TLC and GC-MS, the crude mixture product was obtained by flash column chromatography on silica gel (petroleum ether : ethyl acetate = 2 : 1). The crude product follow by recrystallization from dichloromethane and n-hexane afforded pure product

### Procedure for gram scale synthesis of 3a:

In an oven-dried undivided beaker (100 mL) equipped with a stir bar, (*E*)-3-(dimethylamino)-1-phenylprop-2-en-1-one **1a** (5.0 mmol, 876.2 mg), ammonium thiocyanate **2a** (35.0 mmol, 2664.2 mg), MeCN/H<sub>2</sub>O/HFIP (110 mL, v/v/v = 90/10/10) was added. The bottle was equipped with graphite rod ( $\phi$  6 mm, about 15 mm immersion depth in solution) as the anode and platinum plate (15 mm $\times$ 15 mm $\times$ 0.3 mm) as the cathode. The reaction mixture was stirred and electrolyzed at a constant current of 25 mA under N<sub>2</sub> atmosphere at room temperature for 22 h, After completion of the reaction, as indicated by TLC and GC-MS, The pure product (yield 62%, yellow solid, 0.76 g) was obtained by flash column chromatography on silica gel (petroleum ether : ethyl acetate = 2 : 1).

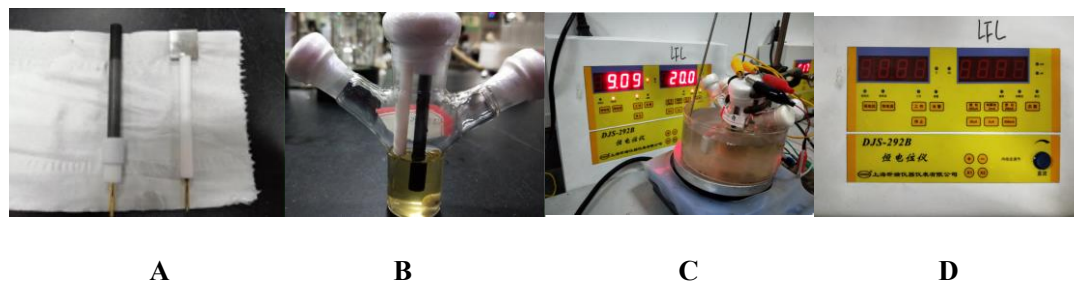

Figure S1. The experimental setup for electrolysis. (A: The electrodes used in the reaction.

B, C and D: The electrochemical reaction apparatus used.)

### General procedure for cyclic voltammetry(CV):

Cyclic voltammetry was performed in a three-electrode cell connected to a schlenk line under air at room temperature. The working electrode was a glassy carbon electrode, the counter electrode a platinum wire. The reference was an Ag/AgCl electrode submerged in saturated aqueous KCl solution. 10 mL of CH<sub>3</sub>CN containing 0.01 M <sup>n</sup>Bu<sub>4</sub>NBF<sub>4</sub> were poured into the electrochemical cell in all experiments. The scan rate is 0.1 V/s, ranging from 0 V to 3.0 V. The peak potentials vs. Ag/AgCl for used. An obvious oxidation peak of **1a** was observed at 1.59 V. The oxidation peak of **2a** could also be observed at 1.49 V.

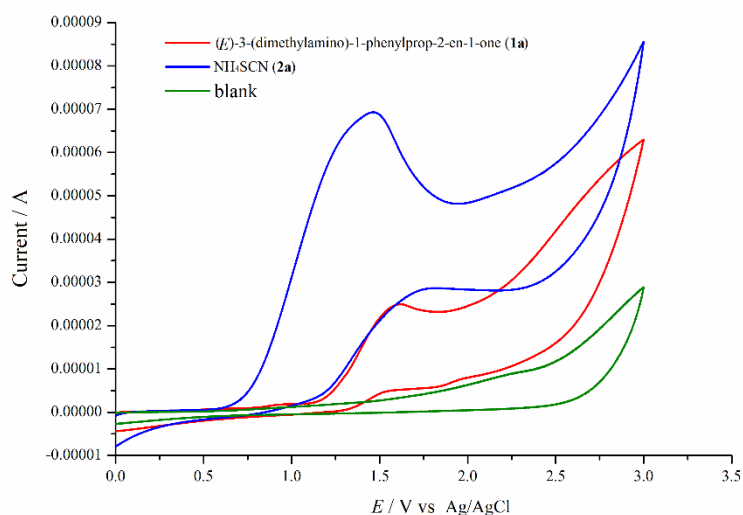

**Figure S1** Cyclic voltammetry

## Detail descriptions for products

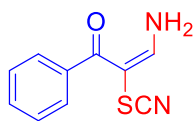

The desired product was obtained as a pair of inseparable isomers (Yellow solid was obtained in 84% isolated yield (E/Z>20/1), 85.8 mg).

**(E)-3-amino-1-phenyl-2-thiocyanatoprop-2-en-1-one (3a).**<sup>1</sup> <sup>1</sup>H NMR (400 MHz, DMSO-*d*<sub>6</sub>)  $\delta$  8.27 - 8.23 (m, 2H), 7.68 - 7.62 (m, 1H), 7.54 - 7.44 (m, 5H); <sup>13</sup>C NMR (101 MHz, DMSO-*d*<sub>6</sub>)  $\delta$  189.90, 158.99, 140.07, 130.76, 128.80, 128.32, 112.69, 89.99.

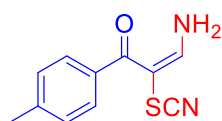

The desired product was obtained as a pair of inseparable isomers (Yellow solid was obtained in 76% isolated yield (E/Z>20/1), 82.9 mg).

**(E)-3-amino-2-thiocyanato-1-(p-tolyl)prop-2-en-1-one (3b).**<sup>1</sup> <sup>1</sup>H NMR (400 MHz, DMSO-*d*<sub>6</sub>)  $\delta$  8.13 - 8.05 (m, 2H), 7.63 - 7.56 (m, 1H), 7.29 (d, *J* = 8.0 Hz, 2H), 7.19 (d, *J* = 8.0 Hz, 2H), 2.28 (s, 3H); <sup>13</sup>C NMR (101 MHz, DMSO-*d*<sub>6</sub>)  $\delta$  189.76, 158.71, 140.67, 137.18, 129.28, 128.51, 112.68, 89.95, 21.41.

HRMS (ESI) calcd for C<sub>11</sub>H<sub>10</sub>N<sub>2</sub>OS: 241.0406 (M+Na<sup>+</sup>), found: 241.0406.

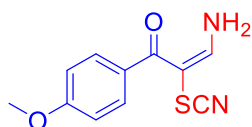

The desired product was obtained as a pair of inseparable isomers (Yellow solid was obtained in 85% isolated yield (E/Z=14/1), 99.6 mg).

**(E)-3-amino-1-(4-methoxyphenyl)-2-thiocyanatoprop-2-en-1-one (3c).**<sup>1</sup> <sup>1</sup>H NMR (400 MHz, DMSO-*d*<sub>6</sub>)  $\delta$  8.19 - 8.08 (m, 2H), 7.75 - 7.69 (m, 1H), 7.47 (d, *J* = 8.0 Hz, 2H), 7.00 (d, *J* = 8.0 Hz, 2H), 3.81 (s, 3H); <sup>13</sup>C NMR (101 MHz, DMSO-*d*<sub>6</sub>)  $\delta$  189.06, 161.54, 158.41, 132.07, 130.59, 114.05, 112.75, 89.72, 55.78.

HRMS (ESI) calcd for C<sub>11</sub>H<sub>10</sub>N<sub>2</sub>O<sub>2</sub>S: 257.0355 (M+Na<sup>+</sup>), found: 257.0357.

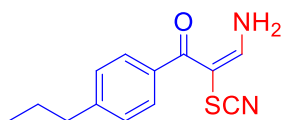

The desired product was obtained as a pair of inseparable isomers (Yellow solid was obtained in 67% isolated yield (E/Z=12/1), 87.2 mg).

**(E)-3-amino-1-(4-propylphenyl)-2-thiocyanatoprop-2-en-1-one (3d).**  $^1\text{H}$  NMR (400 MHz, DMSO- $d_6$ )  $\delta$  8.10 - 8.07 (m, 2H), 7.63 - 7.58 (m, 1H), 7.31 (d,  $J$  = 8.0 Hz, 2H), 7.20 (d,  $J$  = 8.0 Hz, 2H), 2.53 (t,  $J$  = 8.0 Hz, 2H), 1.54 (q,  $J$  = 8.0 Hz, 2H), 0.83 (t,  $J$  = 8.0 Hz, 3H);  $^{13}\text{C}$  NMR (101 MHz, DMSO- $d_6$ )  $\delta$  189.75, 158.74, 145.24, 137.45, 128.68, 128.50, 112.66, 89.96, 37.50, 24.30, 14.07.

HRMS (ESI) calcd for  $\text{C}_{13}\text{H}_{14}\text{N}_2\text{OS}$ : 269.0719 ( $\text{M}+\text{Na}^+$ ), found: 269.0728.

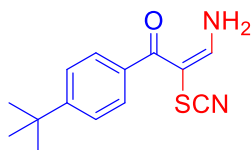

The desired product was obtained as a pair of inseparable isomers (Yellow solid was obtained in 69% isolated yield (E/Z=14/1), 89.7 mg).

**(E)-3-amino-1-(4-(tert-butyl)phenyl)-2-thiocyanatoprop-2-en-1-one (3e).**  $^1\text{H}$  NMR (400 MHz, DMSO- $d_6$ )  $\delta$  8.19 - 8.16 (m, 2H), 7.72 - 7.66 (m, 1H), 7.48 (d,  $J$  = 8.0 Hz, 2H), 7.41 (d,  $J$  = 8.0 Hz, 2H), 1.31 (s, 9H);  $^{13}\text{C}$  NMR (101 MHz, DMSO- $d_6$ )  $\delta$  189.71, 158.81, 153.56, 137.21, 128.35, 125.54, 112.68, 89.94, 35.04, 31.43.

HRMS (ESI) calcd for  $\text{C}_{14}\text{H}_{16}\text{N}_2\text{OS}$ : 283.0876 ( $\text{M}+\text{Na}^+$ ), found: 283.0886.

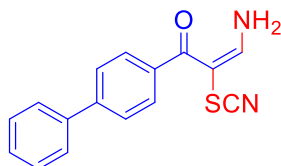

The desired product was obtained as a pair of inseparable isomers (Yellow solid was obtained in 45% isolated yield (E/Z=2/1), 63.1 mg).

**(E)-1-([1,1'-biphenyl]-4-yl)-3-amino-2-thiocyanatoprop-2-en-1-one (3f).**  $^1\text{H}$  NMR (400 MHz, DMSO- $d_6$ )  $\delta$  8.29 - 8.24 (m, 2H), 7.79 - 7.71 (m, 5H), 7.56 (d,  $J$  = 8.0 Hz, 2H), 7.50 (t,  $J$  = 8.0 Hz, 2H), 7.41 (t,  $J$  = 8.0 Hz, 1H);  $^{13}\text{C}$  NMR (101 MHz, DMSO- $d_6$ )  $\delta$  189.52, 158.96, 142.45, 139.70, 138.92, 129.52, 129.16, 128.46, 127.29, 127.03, 112.72, 89.99.

HRMS (ESI) calcd for  $\text{C}_{16}\text{H}_{12}\text{N}_2\text{OS}$ : 303.0563 ( $\text{M}+\text{Na}^+$ ), found: 303.0565.

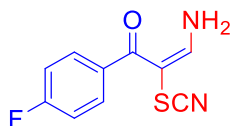

The desired product was obtained as a pair of inseparable isomers (Yellow solid was obtained in 79% isolated yield (E/Z=1/1.4), 87.8 mg).

**(E)-3-amino-1-(4-fluorophenyl)-2-thiocyanatoprop-2-en-1-one (3g)**  $^1\text{H}$  NMR (400 MHz, DMSO- $d_6$ )  $\delta$  8.31 - 8.27 (s, 2H), 7.84 - 7.82 (m, 1H), 7.70 (t,  $J$  = 8.0 Hz, 1H), 7.57 - 7.55 (m, 1H), 7.36 - 7.30 (m, 2H);  $^{13}\text{C}$  NMR (101 MHz, DMSO- $d_6$ )  $\delta$  188.72, 164.50 (d,  $J$  = 250.5 Hz), 158.98, 135.19 (d,  $J$  = 3.0 Hz), 130.98 (d,  $J$  = 9.1 Hz), 116.02 (d,  $J$  = 22.2 Hz), 112.65, 89.83.  $^{19}\text{F}$  NMR (376 MHz, DMSO- $d_6$ )  $\delta$  -108.26.

**(Z)-3-amino-1-(4-fluorophenyl)-2-thiocyanatoprop-2-en-1-one (3g)**  $^1\text{H}$  NMR (400 MHz, DMSO- $d_6$ )  $\delta$  8.22 (s, 2H), 7.81 - 7.79 (m, 1H), 7.66 (s, 1H), 7.54 - 7.51 (m, 1H), 7.30 - 7.25 (m, 2H);  $^{13}\text{C}$  NMR (101 MHz, DMSO- $d_6$ )  $\delta$  184.44, 175.23, 163.62 (d,  $J$  = 248.5 Hz), 151.54, 136.44 (d,  $J$  = 3.0 Hz), 131.38 (d,  $J$  = 9.1 Hz), 127.14, 115.71 (d,  $J$  = 22.2 Hz).  $^{19}\text{F}$  NMR (376 MHz, DMSO- $d_6$ )  $\delta$  -110.12.

HRMS (ESI) calcd for  $\text{C}_{10}\text{H}_7\text{FN}_2\text{OS}$ : 245.0155 ( $\text{M}+\text{Na}^+$ ), found: 245.0159.

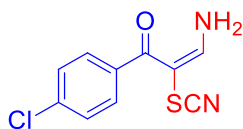

The desired product was obtained as a pair of inseparable isomers (Yellow solid was obtained in 74% isolated yield (E/Z=2/1), 88.3 mg).

**(E)-3-amino-1-(4-chlorophenyl)-2-thiocyanatoprop-2-en-1-one (3h).**<sup>1</sup>  $^1\text{H}$  NMR (400 MHz, DMSO- $d_6$ )  $\delta$  8.34 - 8.32 (m, 2H), 7.77 - 7.68 (m, 1H), 7.57 - 7.51 (m, 4H);  $^{13}\text{C}$  NMR (101 MHz, DMSO- $d_6$ )  $\delta$  188.79, 159.16, 138.75, 135.50, 130.28, 128.86, 112.63, 89.88.

**(Z)-3-amino-1-(4-chlorophenyl)-2-thiocyanatoprop-2-en-1-one (3h).**  $^1\text{H}$  NMR (400 MHz, DMSO- $d_6$ )  $\delta$  8.27 (s, 2H), 7.66 (s, 1H), 7.50 - 7.48 (m, 4H);  $^{13}\text{C}$  NMR (101 MHz, DMSO- $d_6$ )  $\delta$  184.57, 175.38, 151.86, 137.30, 136.91, 130.56, 129.15, 127.04.

HRMS (ESI) calcd for  $\text{C}_{10}\text{H}_7\text{ClN}_2\text{OS}$ : 239.0040 ( $\text{M}+\text{H}^+$ ), found: 239.0048.



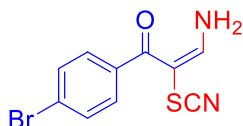

The desired product was obtained as a pair of inseparable isomers (Yellow solid was obtained in 75% isolated yield (E/Z=2.7/1), 106.2 mg).

**(E)-3-amino-1-(4-bromophenyl)-2-thiocyanatoprop-2-en-1-one (3i).**<sup>1</sup> <sup>1</sup>H NMR (400 MHz, DMSO-*d*<sub>6</sub>)  $\delta$  8.33 - 8.29 (m, 2H), 7.63 (s, 2H), 7.41 (d, *J* = 8.0 Hz, 3H); <sup>13</sup>C NMR (101 MHz, DMSO-*d*<sub>6</sub>)  $\delta$  188.82, 159.12, 139.16, 131.76, 130.45, 124.28, 112.57, 89.89.

**(Z)-3-amino-1-(4-bromophenyl)-2-thiocyanatoprop-2-en-1-one (3i).** <sup>1</sup>H NMR (400 MHz, DMSO-*d*<sub>6</sub>)  $\delta$  8.25 (s, 2H), 7.73 - 7.65 (m, 5H); <sup>13</sup>C NMR (101 MHz, DMSO-*d*<sub>6</sub>)  $\delta$  184.63, 175.41, 151.83, 137.68, 132.05, 130.70, 127.05, 125.84.

HRMS (ESI) calcd for C<sub>10</sub>H<sub>7</sub>BrN<sub>2</sub>OS: 282.9535 (M+H<sup>+</sup>), found: 282.9533.

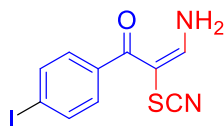

The desired product was obtained as a pair of inseparable isomers (Yellow solid was obtained in 80% isolated yield (E/Z=1/1), 132.1 mg).

**(E)-3-amino-1-(4-iodophenyl)-2-thiocyanatoprop-2-en-1-one (3j).** <sup>1</sup>H NMR (400 MHz, DMSO-*d*<sub>6</sub>)  $\delta$  8.31 - 8.29 (m, 2H), 7.83 (d, *J* = 8.0 Hz, 3H), 7.71 - 7.65 (m, 2H); <sup>13</sup>C NMR (101 MHz, DMSO-*d*<sub>6</sub>)  $\delta$  189.06, 159.10, 139.47, 130.54, 129.41, 112.57, 97.87, 89.85.

**(Z)-3-amino-1-(4-iodophenyl)-2-thiocyanatoprop-2-en-1-one (3j).** <sup>1</sup>H NMR (400 MHz, DMSO-*d*<sub>6</sub>)  $\delta$  8.24 (s, 2H), 7.89 (d, *J* = 8.0 Hz, 1H), 7.51 (d, *J* = 8.0 Hz, 1H), 7.25 (d, *J* = 8.0 Hz, 3H); <sup>13</sup>C NMR (101 MHz, DMSO-*d*<sub>6</sub>)  $\delta$  184.91, 175.36, 151.76, 137.92, 137.61, 130.34, 127.05, 99.82.

HRMS (ESI) calcd for C<sub>10</sub>H<sub>7</sub>IN<sub>2</sub>OS: 352.9216 (M+Na<sup>+</sup>), found: 352.9227.

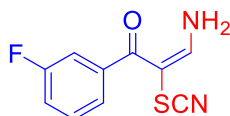

The desired product was obtained as a pair of inseparable isomers (Yellow solid was obtained in 87% isolated yield (E/Z=10/1), 96.6 mg).

**(E)-3-amino-1-(3-fluorophenyl)-2-thiocyanatoprop-2-en-1-one (3k).** <sup>1</sup>H NMR (400 MHz,

DMSO-*d*<sub>6</sub>)  $\delta$  8.35 - 8.27 (m, 2H), 7.74 - 7.68 (m, 1H), 7.57 - 7.48 (m, 1H), 7.36 - 7.27 (m, 3H); <sup>13</sup>C NMR (101 MHz, DMSO-*d*<sub>6</sub>)  $\delta$  188.38, 162.21 (d, *J* = 247.5 Hz), 159.26, 142.41 (d, *J* = 6.1 Hz), 130.93 (d, *J* = 8.1 Hz), 124.41 (d, *J* = 2.0 Hz), 117.53 (d, *J* = 20.2 Hz), 115.13 (d, *J* = 22.2 Hz), 112.54, 89.80. <sup>19</sup>F NMR (376 MHz, DMSO-*d*<sub>6</sub>)  $\delta$  -112.42.

HRMS (ESI) calcd for C<sub>10</sub>H<sub>7</sub>FN<sub>2</sub>OSNa: 245.0155 (M+Na<sup>+</sup>), found: 245.0159.

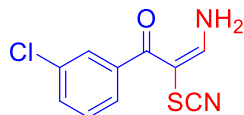

The desired product was obtained as a pair of inseparable isomers (Yellow solid was obtained in 75% isolated yield (E/Z=11/1), 89.5 mg).

**(E)-3-amino-1-(3-chlorophenyl)-2-thiocyanatoprop-2-en-1-one (3l).** <sup>1</sup>H NMR (400 MHz, DMSO-*d*<sub>6</sub>)  $\delta$  8.34 - 8.28 (m, 2H), 7.73 - 7.65 (m, 1H), 7.57 (d, *J* = 8.0 Hz, 1H), 7.49 (d, *J* = 8.0 Hz, 2H), 7.41 (d, *J* = 8.0 Hz, 1H); <sup>13</sup>C NMR (101 MHz, DMSO-*d*<sub>6</sub>)  $\delta$  188.30, 159.29, 142.16, 133.58, 130.74, 130.53, 127.95, 126.93, 112.53, 89.81.

HRMS (ESI) calcd for C<sub>10</sub>H<sub>8</sub>ClN<sub>2</sub>OS: 239.0040 (M+H<sup>+</sup>), found: 239.0048.

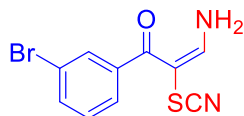

The desired product was obtained as a pair of inseparable isomers (Yellow solid was obtained in 66% isolated yield (E/Z=5/1), 93.4 mg).

**(E)-3-amino-1-(3-bromophenyl)-2-thiocyanatoprop-2-en-1-one (3m).** <sup>1</sup>H NMR (400 MHz, DMSO-*d*<sub>6</sub>)  $\delta$  8.37 - 8.31 (m, 2H), 7.83 - 7.67 (m, 2H), 7.61 (s, 1H), 7.47 - 7.41 (m, 2H); <sup>13</sup>C NMR (101 MHz, DMSO-*d*<sub>6</sub>)  $\delta$  188.21, 159.29, 142.36, 133.43, 131.23, 130.78, 127.30, 122.08, 112.54, 89.82.

**(Z)-3-amino-1-(3-bromophenyl)-2-thiocyanatoprop-2-en-1-one (3m).** <sup>1</sup>H NMR (400 MHz, DMSO-*d*<sub>6</sub>)  $\delta$  8.29 (s, 2H), 7.66 - 7.61 (m, 4H), 7.39 (s, 1H). <sup>13</sup>C NMR (101 MHz, DMSO-*d*<sub>6</sub>)  $\delta$  184.09, 175.56, 152.21, 140.82, 134.71, 130.99, 127.70, 126.81, 126.24, 122.34.

HRMS (ESI) calcd for C<sub>10</sub>H<sub>7</sub>BrN<sub>2</sub>OS: 282.9535 (M+H<sup>+</sup>), found: 282.9533.

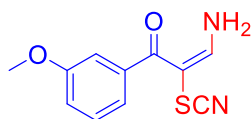

The desired product was obtained as a pair of inseparable isomers (Yellow solid was obtained in

82% isolated yield (E/Z=8/1), 95.9 mg).

**(E)-3-amino-1-(3-methoxyphenyl)-2-thiocyanatoprop-2-en-1-one (3n).**  $^1\text{H}$  NMR (400 MHz, DMSO- $d_6$ )  $\delta$  8.25 - 8.21 (m, 2H), 7.73 - 7.66 (m, 1H), 7.45 - 7.35 (m, 1H), 7.21 - 6.98 (m, 3H), 3.79 (s, 3H);  $^{13}\text{C}$  NMR (101 MHz, DMSO- $d_6$ )  $\delta$  189.62, 159.48, 159.06, 141.47, 129.93, 120.49, 116.54, 113.39, 112.68, 89.94, 55.70.

HRMS (ESI) calcd for  $\text{C}_{11}\text{H}_{10}\text{N}_2\text{O}_2\text{S}$ : 235.0536 ( $\text{M}+\text{H}^+$ ), found: 235.0535.

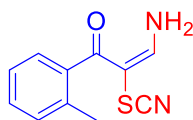

The desired product was obtained as a pair of inseparable isomers (Yellow solid was obtained in 60% isolated yield (E/Z=20/1), 61.2 mg).

**(E)-3-amino-2-thiocyanato-1-(o-tolyl)prop-2-en-1-one (3o).**  $^1\text{H}$  NMR (400 MHz, DMSO- $d_6$ )  $\delta$  8.31 - 8.20 (m, 2H), 7.40 - 7.31 (m, 2H), 7.28 - 7.22 (m, 2H), 7.12 (d,  $J$  = 8.0 Hz, 3H), 2.14 (s, 3H);  $^{13}\text{C}$  NMR (101 MHz, DMSO- $d_6$ )  $\delta$  190.93, 158.83, 140.45, 134.84, 130.83, 129.29, 126.85, 125.97, 112.56, 91.16, 18.97.

HRMS (ESI) calcd for  $\text{C}_{11}\text{H}_{10}\text{N}_2\text{OS}$ : 241.0406 ( $\text{M}+\text{Na}^+$ ), found: 241.0413.

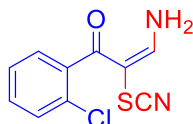

The desired product was obtained as a pair of inseparable isomers (Yellow solid was obtained in 75% isolated yield (E/Z>20/1), 89.5 mg).

**(E)-3-amino-1-(2-chlorophenyl)-2-thiocyanatoprop-2-en-1-one (3p).**  $^1\text{H}$  NMR (400 MHz, DMSO- $d_6$ )  $\delta$  8.36 (s, 2H), 7.56 - 7.42 (m, 4H), 7.29 (s, 1H);  $^{13}\text{C}$  NMR (101 MHz, DMSO- $d_6$ )  $\delta$  184.34, 176.13, 153.19, 138.58, 131.70, 130.33, 130.23, 129.38, 127.58, 127.03.

HRMS (ESI) calcd for  $\text{C}_{10}\text{H}_7\text{ClN}_2\text{OS}$ : 260.9860 ( $\text{M}+\text{Na}^+$ ), found: 260.9869.

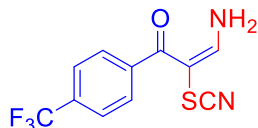

The desired product was obtained as a pair of inseparable isomers (Yellow solid was obtained in 80% isolated yield (E/Z=1.5/1), 108.8 mg).

**(E)-3-amino-2-thiocyanato-1-(4-(trifluoromethyl)phenyl)prop-2-en-1-one (3q).**  $^1\text{H}$  NMR (400

MHz, DMSO- $d_6$ )  $\delta$  8.40 - 8.36 (m, 2H), 7.81 (d,  $J$  = 8.0 Hz, 2H), 7.71 - 7.67 (m, 3H);  $^{13}\text{C}$  NMR (101 MHz, DMSO- $d_6$ )  $\delta$  188.77, 159.51, 144.12, 130.63 (q,  $J$  = 32.3 Hz), 128.99, 125.97 (q,  $J$  = 4.0 Hz), 124.26 (q,  $J$  = 248.5 Hz), 112.53, 89.99.  $^{19}\text{F}$  NMR (376 MHz, DMSO- $d_6$ )  $\delta$  -61.40.

**(Z)-3-amino-2-thiocyanato-1-(4-(trifluoromethyl)phenyl)prop-2-en-1-one (3q).**  $^1\text{H}$  NMR (400 MHz, DMSO- $d_6$ )  $\delta$  8.33 (s, 2H), 7.92 (d,  $J$  = 8.0 Hz, 2H), 7.87 (d,  $J$  = 8.0 Hz, 2H), 7.65 (s, 1H);  $^{13}\text{C}$  NMR (101 MHz, DMSO- $d_6$ )  $\delta$  184.60, 175.71, 152.62, 142.25, 131.71 (q,  $J$  = 31.3 Hz), 129.42, 126.89, 125.74 (q,  $J$  = 4.0 Hz), 124.20 (q,  $J$  = 247.5 Hz).  $^{19}\text{F}$  NMR (376 MHz, DMSO- $d_6$ )  $\delta$  -61.50.

HRMS (ESI) calcd for  $\text{C}_{11}\text{H}_7\text{F}_3\text{N}_2\text{OS}$ : 295.0123 ( $\text{M}+\text{Na}^+$ ), found: 295.0131.

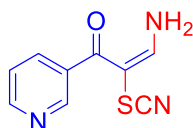

The desired product was obtained as a pair of inseparable isomers (Yellow solid was obtained in 50% isolated yield ( $E/Z > 20/1$ ), 51.2 mg).

**(E)-3-amino-1-(pyridin-3-yl)-2-thiocyanatoprop-2-en-1-one (3r).**  $^1\text{H}$  NMR (400 MHz, DMSO- $d_6$ )  $\delta$  8.88 (s, 1H), 8.77 (d,  $J$  = 8.0 Hz, 1H), 8.31 (s, 2H), 8.11 (d,  $J$  = 8.0 Hz, 1H), 7.70 (s, 1H), 7.56 - 7.53 (m, 1H);  $^{13}\text{C}$  NMR (101 MHz, DMSO- $d_6$ )  $\delta$  183.95, 175.63, 152.53, 152.48, 149.06, 136.29, 134.37, 127.08, 124.18.

HRMS (ESI) calcd for  $\text{C}_9\text{H}_7\text{N}_3\text{OS}$ : 228.0202 ( $\text{M}+\text{Na}^+$ ), found: 228.0209.

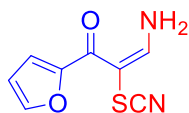

The desired product was obtained as a pair of inseparable isomers (Yellow solid was obtained in 72% isolated yield ( $E/Z > 20/1$ ), 75.7 mg).

**(E)-3-amino-1-(furan-2-yl)-2-thiocyanatoprop-2-en-1-one (3s).**  $^1\text{H}$  NMR (400 MHz, DMSO- $d_6$ )  $\delta$  8.45 - 8.34 (m, 2H), 8.27 - 8.23 (m, 1H), 7.90 (s, 1H), 7.15 (d,  $J$  = 8.0 Hz, 1H), 6.67 (s, 1H);  $^{13}\text{C}$  NMR (101 MHz, DMSO- $d_6$ )  $\delta$  175.39, 157.95, 152.21, 146.20, 117.00, 112.72, 112.25, 89.00. HRMS (ESI) calcd for  $\text{C}_8\text{H}_6\text{N}_2\text{O}_2\text{S}$ : 195.0223 ( $\text{M}+\text{H}^+$ ), found: 195.0222.

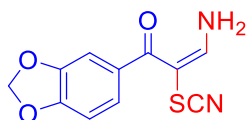

The desired product was obtained as a pair of inseparable isomers (Yellow solid was obtained in 69% isolated yield (E/Z>20/1), 85.5 mg).

**(E)-3-amino-1-(benzo[d][1,3]dioxol-5-yl)-2-thiocyanatoprop-2-en-1-one (3t).** <sup>1</sup>H NMR (400 MHz, DMSO-*d*<sub>6</sub>) δ 8.21 - 8.10 (m, 2H), 7.77 - 7.65 (m, 1H), 7.04 - 6.95 (m, 3H), 6.09 (s, 2H); <sup>13</sup>C NMR (101 MHz, DMSO-*d*<sub>6</sub>) δ 188.66, 158.60, 149.63, 147.67, 133.79, 123.51, 112.72, 108.90, 108.27, 102.04, 89.57.

HRMS (ESI) calcd for C<sub>11</sub>H<sub>8</sub>N<sub>2</sub>O<sub>3</sub>S: 249.0328 (M+H<sup>+</sup>), found: 249.0333

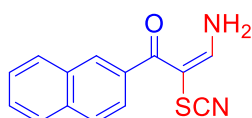

The desired product was obtained as a pair of inseparable isomers (Yellow solid was obtained in 74% isolated yield (E/Z>20/1), 94.1 mg).

**(E)-3-amino-1-(naphthalen-2-yl)-2-thiocyanatoprop-2-en-1-one (3u).** <sup>1</sup>H NMR (400 MHz, DMSO-*d*<sub>6</sub>) δ 8.30 - 8.22 (m, 2H), 8.02 - 7.95 (m, 4H), 7.83 - 7.77 (m, 1H), 7.60 - 7.55 (m, 3H); <sup>13</sup>C NMR (101 MHz, DMSO-*d*<sub>6</sub>) δ 190.11, 159.34, 137.19, 134.07, 132.47, 129.09, 128.57, 128.22, 128.09, 127.91, 127.28, 125.58, 112.76, 90.34.

HRMS (ESI) calcd for C<sub>14</sub>H<sub>10</sub>N<sub>2</sub>OS: 255.0587 (M+H<sup>+</sup>), found: 255.0587.

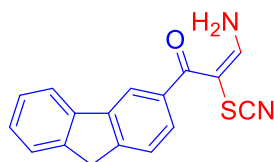

The desired product was obtained as a pair of inseparable isomers (Yellow solid was obtained in 67% isolated yield (E/Z>20/1), 97.9 mg).

**(E)-3-amino-1-(9H-fluoren-3-yl)-2-thiocyanatoprop-2-en-1-one (3v).** <sup>1</sup>H NMR (400 MHz, DMSO-*d*<sub>6</sub>) δ 8.28 - 8.19 (m, 2H), 7.96 (d, *J* = 8.0 Hz, 2H), 7.81 - 7.75 (m, 1H), 7.69 (s, 1H), 7.62 (d, *J* = 8.0 Hz, 1H), 7.51 (d, *J* = 8.0 Hz, 1H), 7.44 - 7.35 (m, 2H), 3.97 (s, 2H); <sup>13</sup>C NMR (101 MHz, DMSO-*d*<sub>6</sub>) δ 189.97, 158.86, 144.18, 143.63, 143.42, 140.71, 138.36, 127.97, 127.53, 127.39, 125.72, 125.38, 121.05, 120.13, 112.75, 90.13, 36.94.

HRMS (ESI) calcd for C<sub>17</sub>H<sub>12</sub>N<sub>2</sub>OS: 315.0563 (M+Na<sup>+</sup>), found: 315.0574.

## References

- (1) Y. Gao, Y. Liu and J.-P. Wan, *J. Org. Chem.*, **2019**, *84*, 2243-2251;

# Copies of $^1\text{H}$ NMR, $^{13}\text{C}$ NMR and $^{19}\text{F}$ NMR spectra

$^1\text{H}$  NMR (400 MHz,  $\text{DMSO}-d_6$ ) of compound **3a**

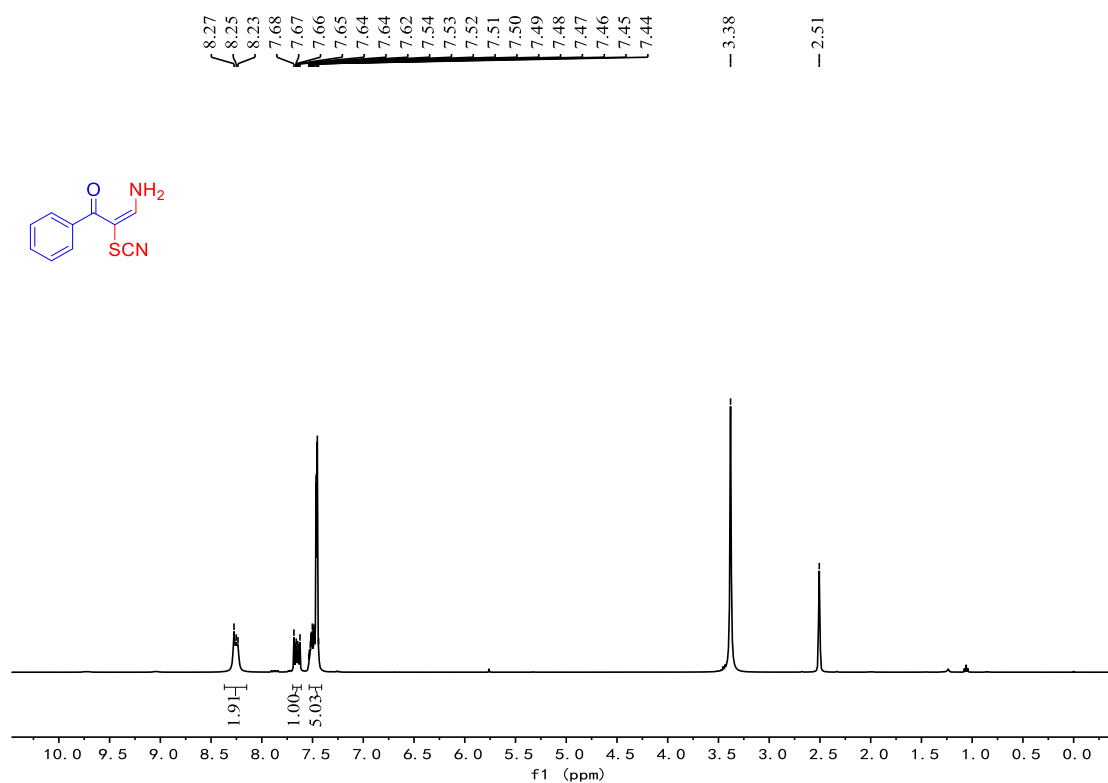

$^{13}\text{C}$  NMR (101 MHz,  $\text{DMSO}-d_6$ ) of compound **3a**

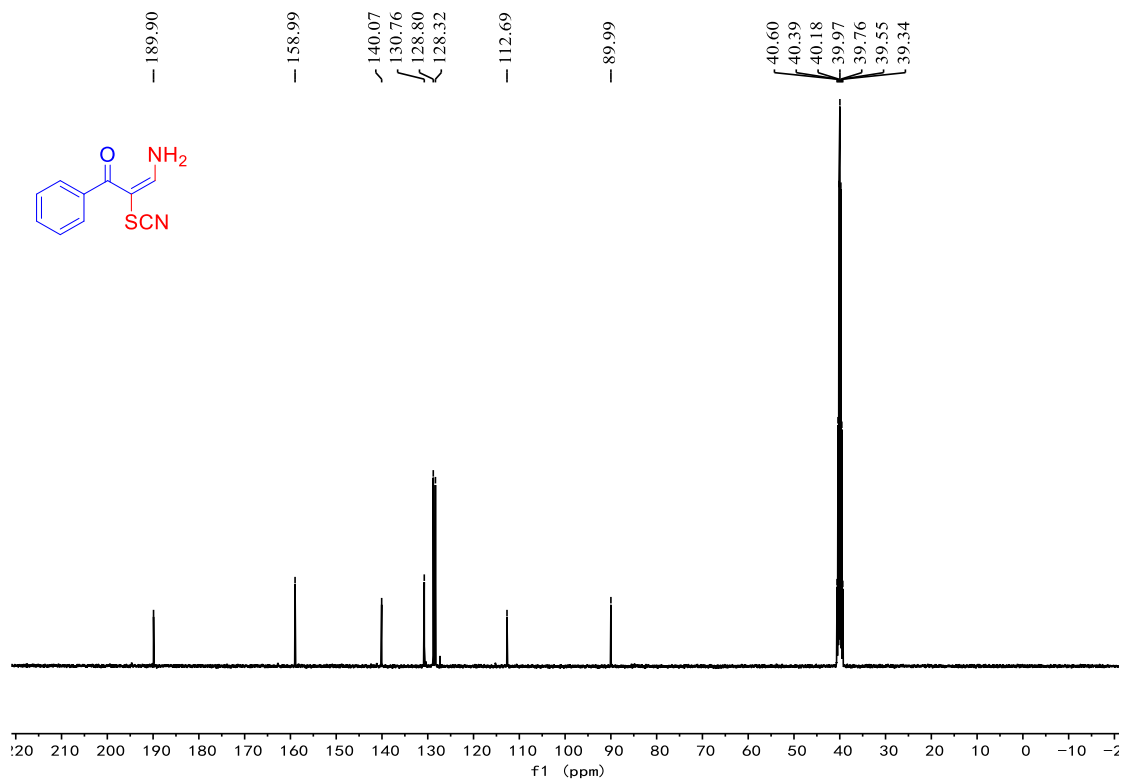

$^1\text{H}$  NMR (400 MHz,  $\text{DMSO-}d_6$ ) of compound **3b**

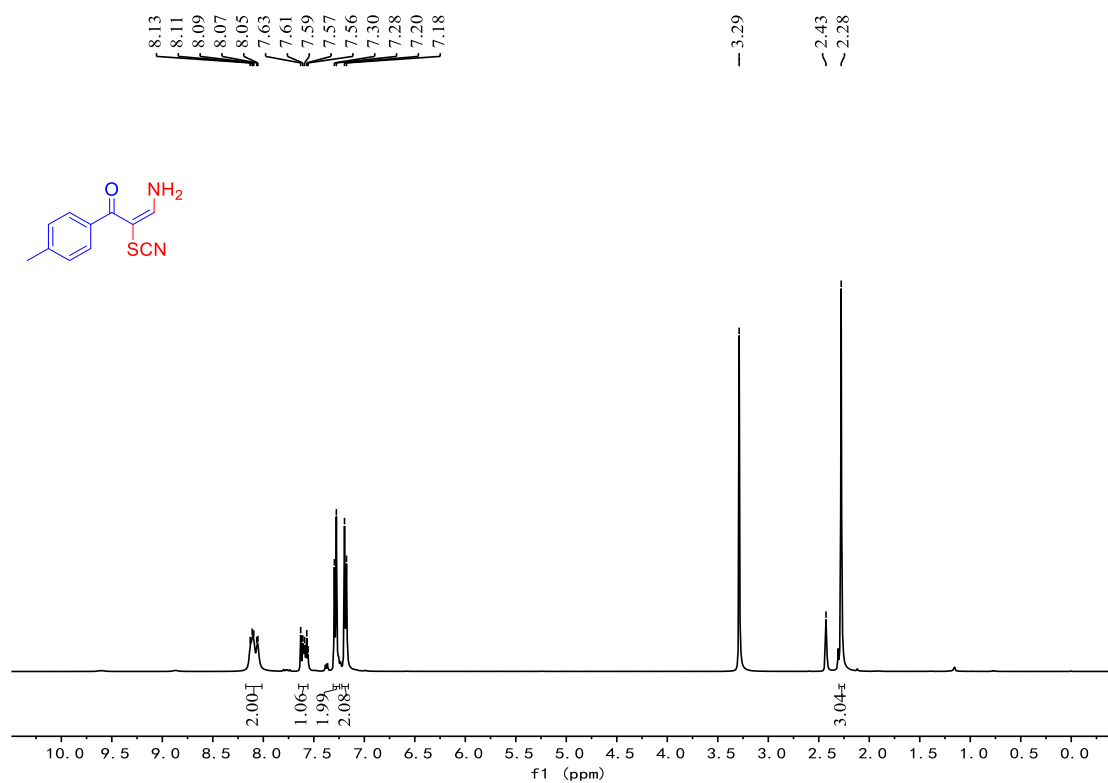

$^{13}\text{C}$  NMR (101 MHz,  $\text{DMSO-}d_6$ ) of compound **3b**

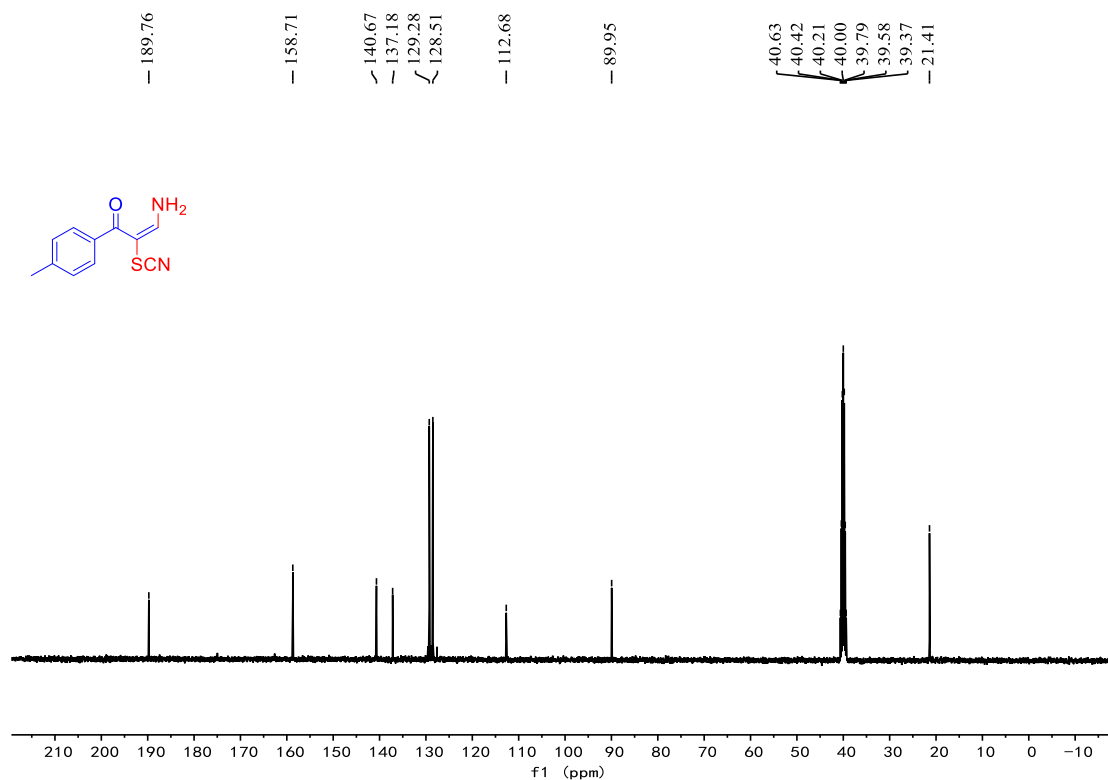

$^1\text{H}$  NMR (400 MHz,  $\text{DMSO}-d_6$ ) of compound **3c**

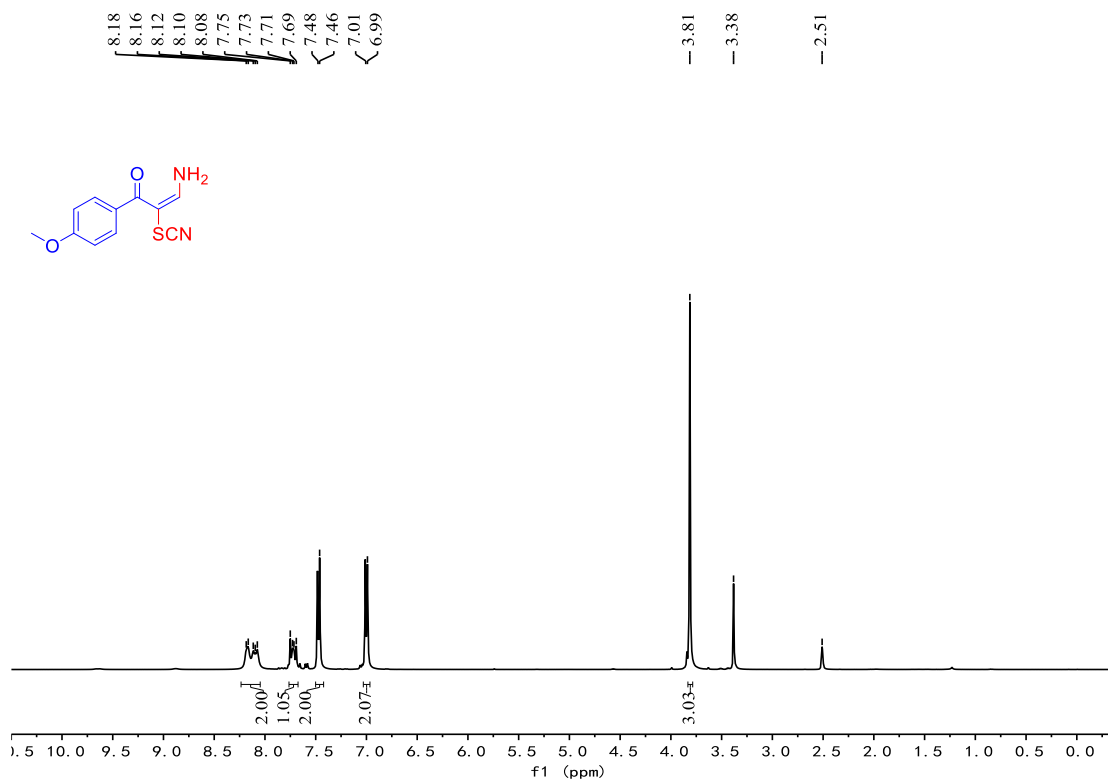

$^{13}\text{C}$  NMR (101 MHz,  $\text{DMSO}-d_6$ ) of compound **3c**

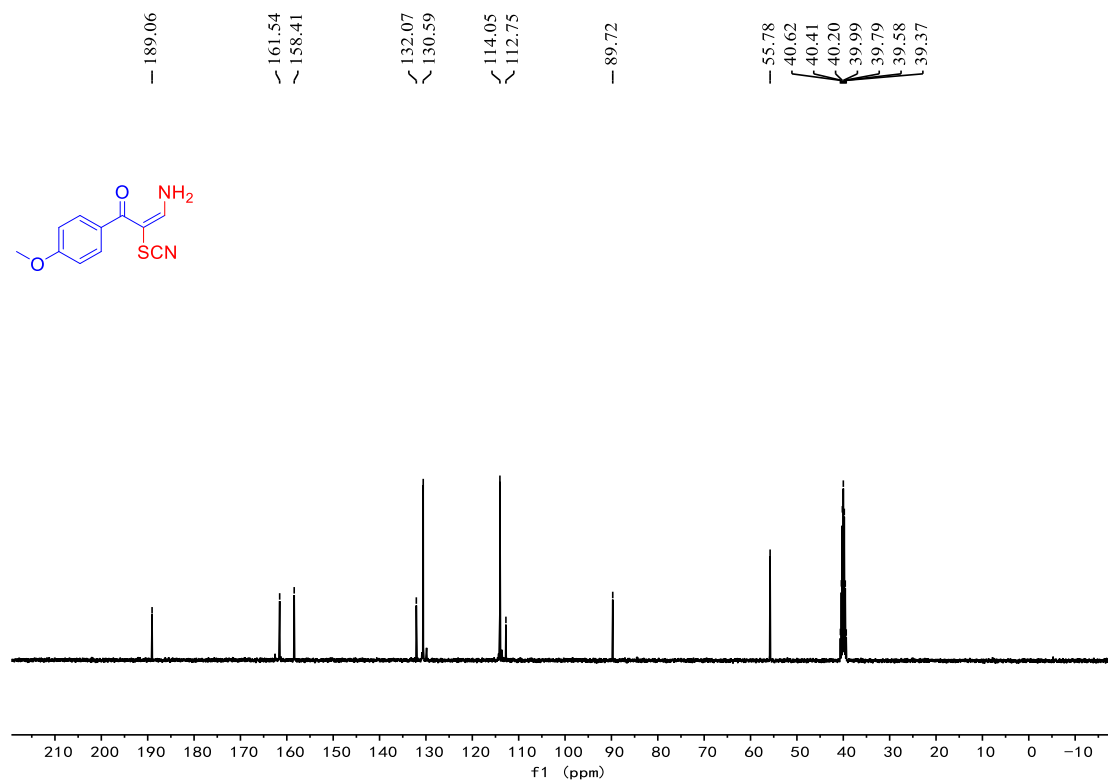



$^1\text{H}$  NMR (400 MHz,  $\text{DMSO-}d_6$ ) of compound **3d**

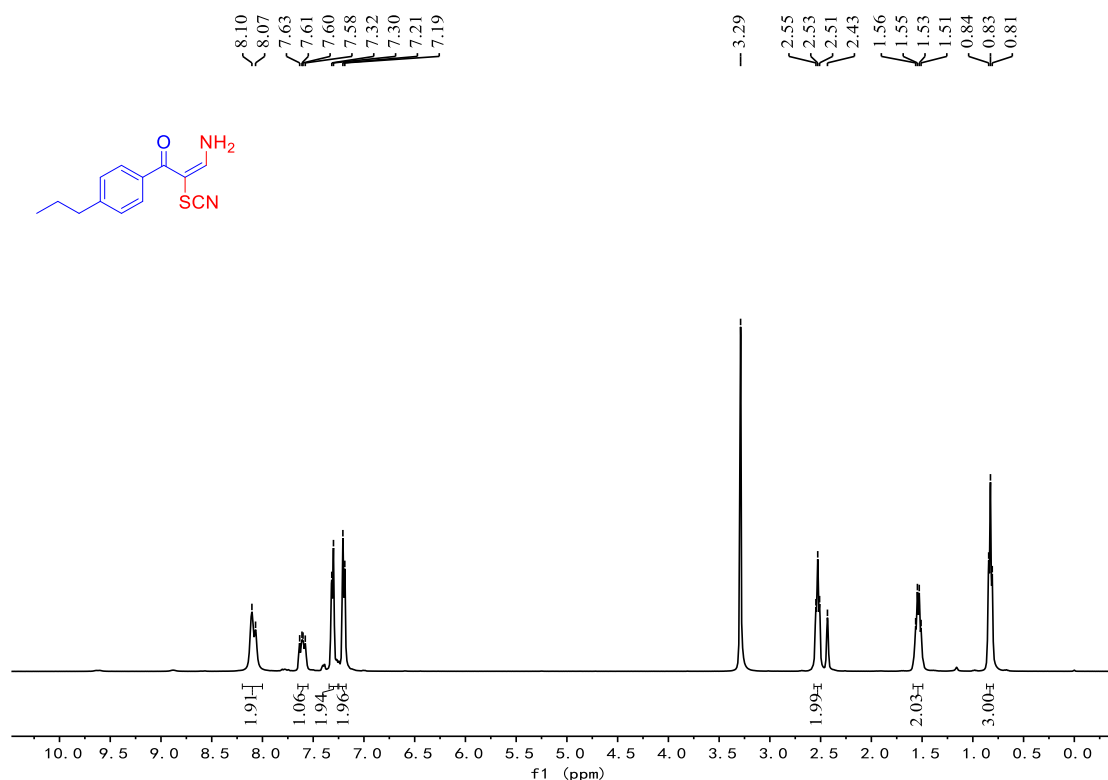

$^{13}\text{C}$  NMR (101 MHz,  $\text{DMSO-}d_6$ ) of compound **3d**

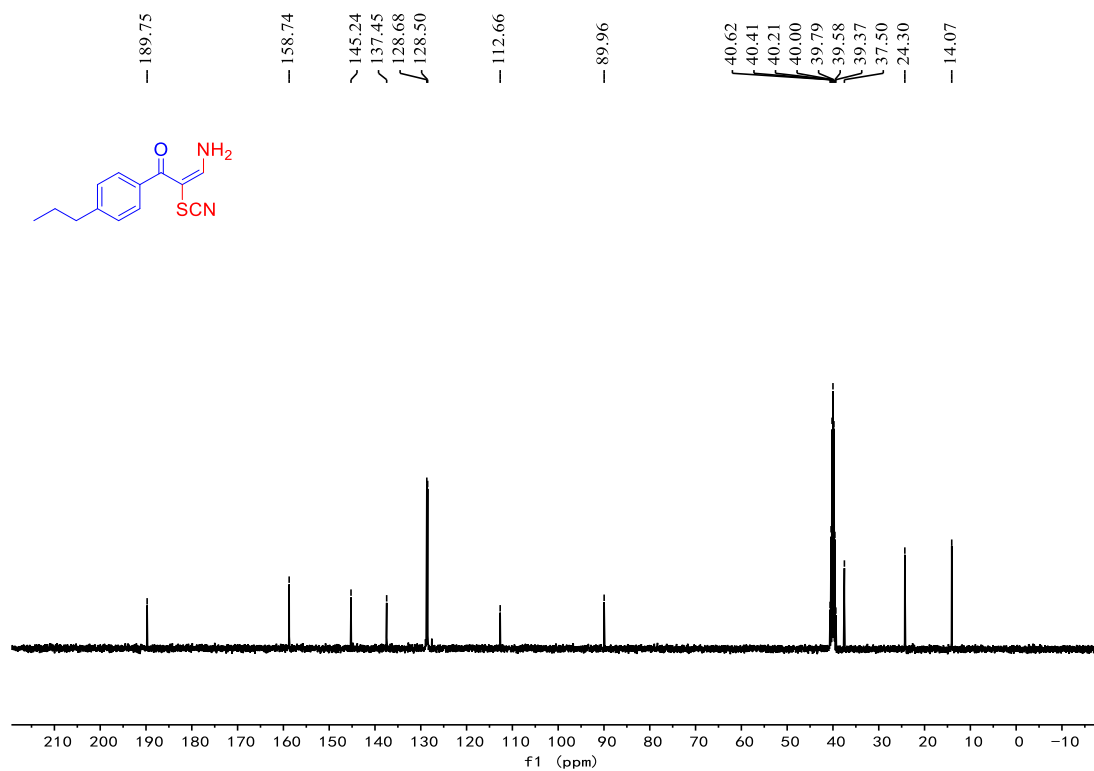

$^1\text{H}$  NMR (400 MHz,  $\text{DMSO-}d_6$ ) of compound **3e**

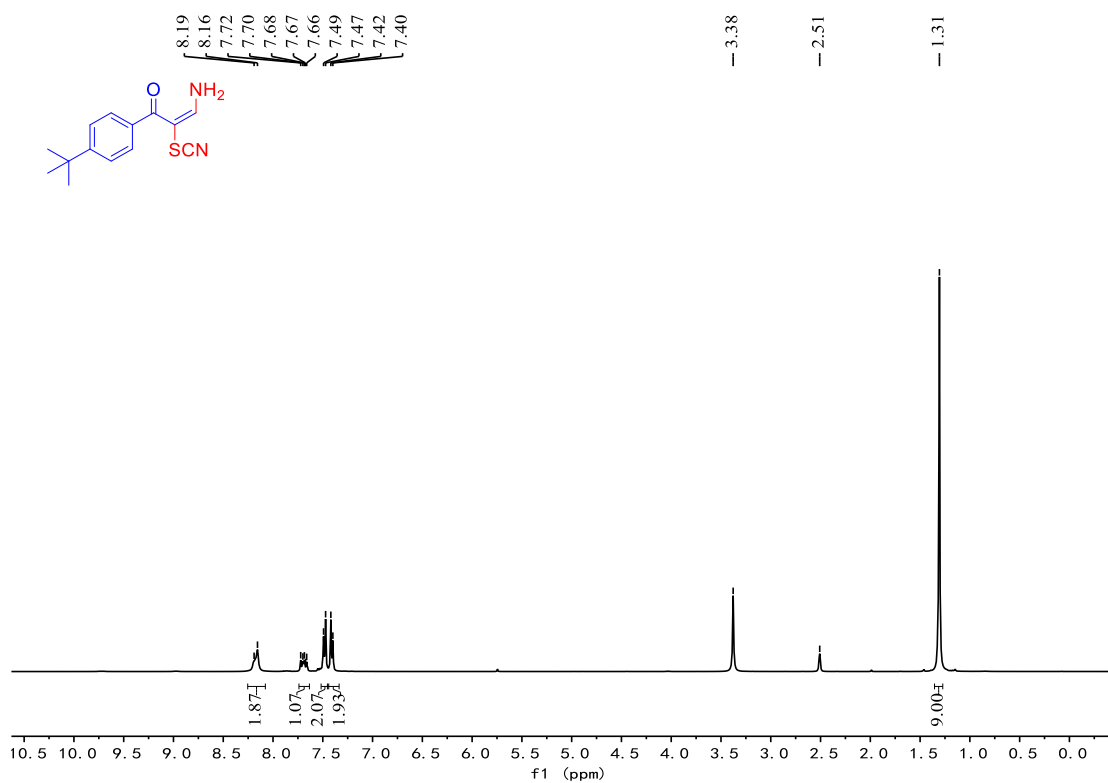

$^{13}\text{C}$  NMR (101 MHz,  $\text{DMSO-}d_6$ ) of compound **3e**

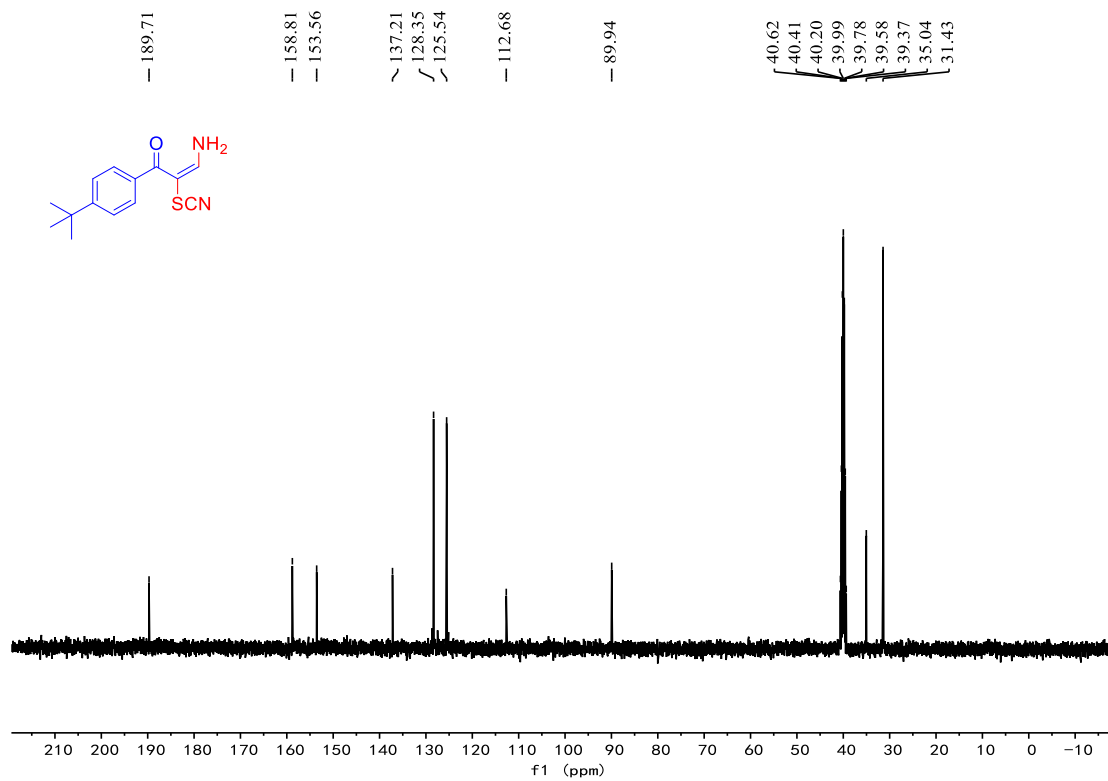

$^1\text{H}$  NMR (400 MHz,  $\text{DMSO-}d_6$ ) of compound **3f**

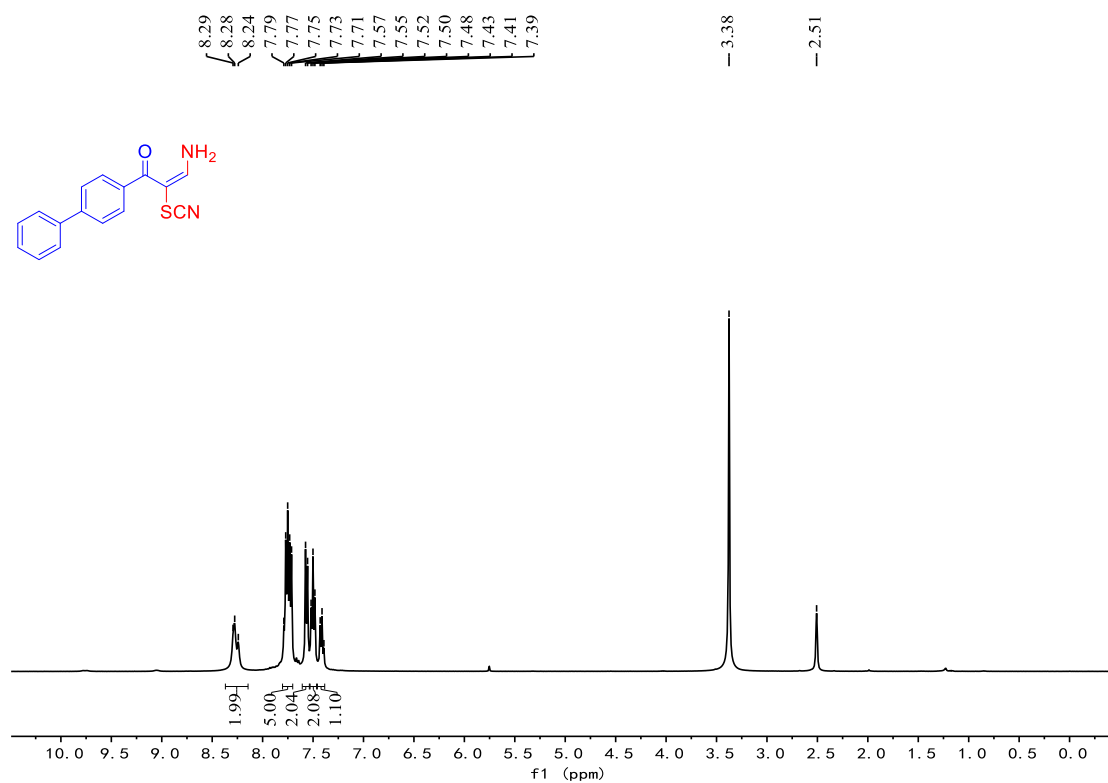

$^{13}\text{C}$  NMR (400 MHz,  $\text{DMSO-}d_6$ ) of compound **3f**

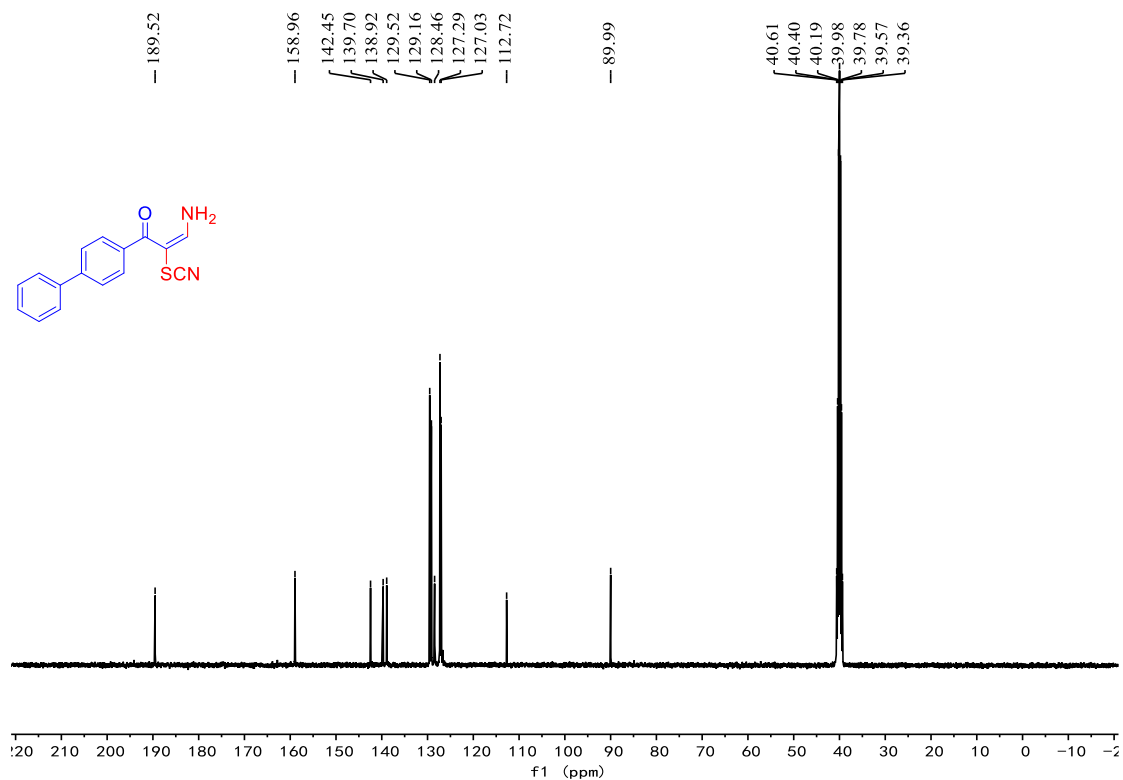

$^1\text{H}$  NMR (400 MHz,  $\text{DMSO}-d_6$ ) of compound **3g**

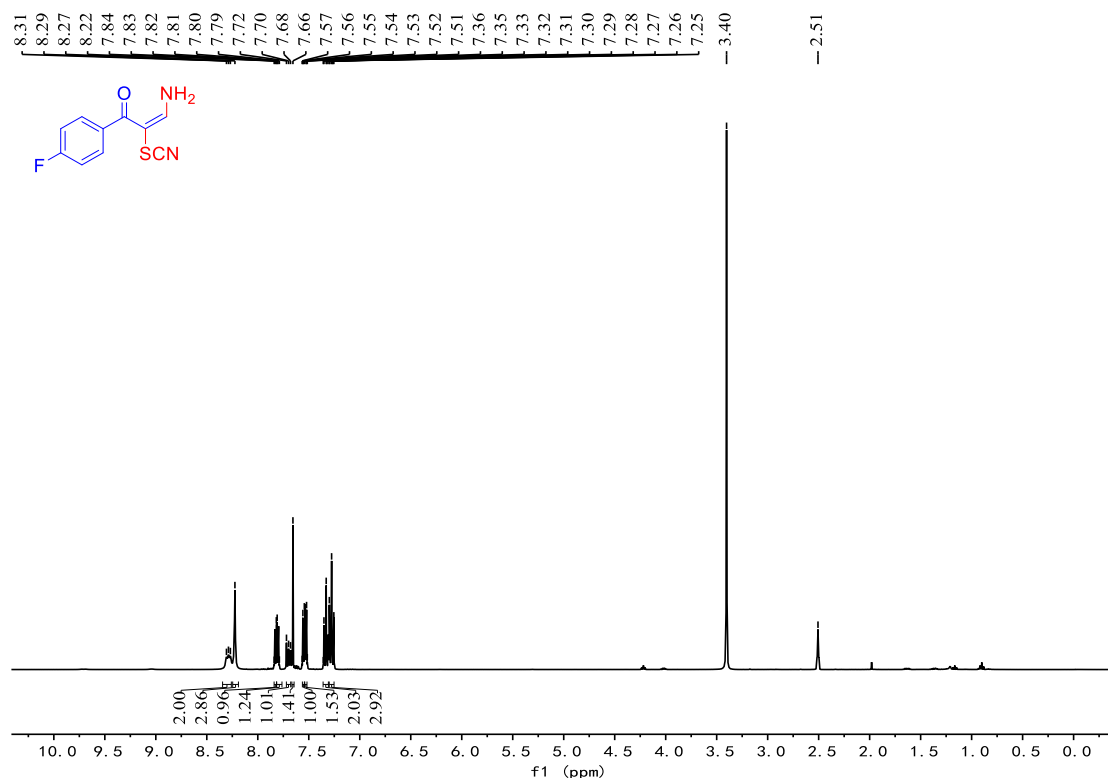

$^{13}\text{C}$  NMR (101 MHz,  $\text{DMSO}-d_6$ ) of compound **3g**

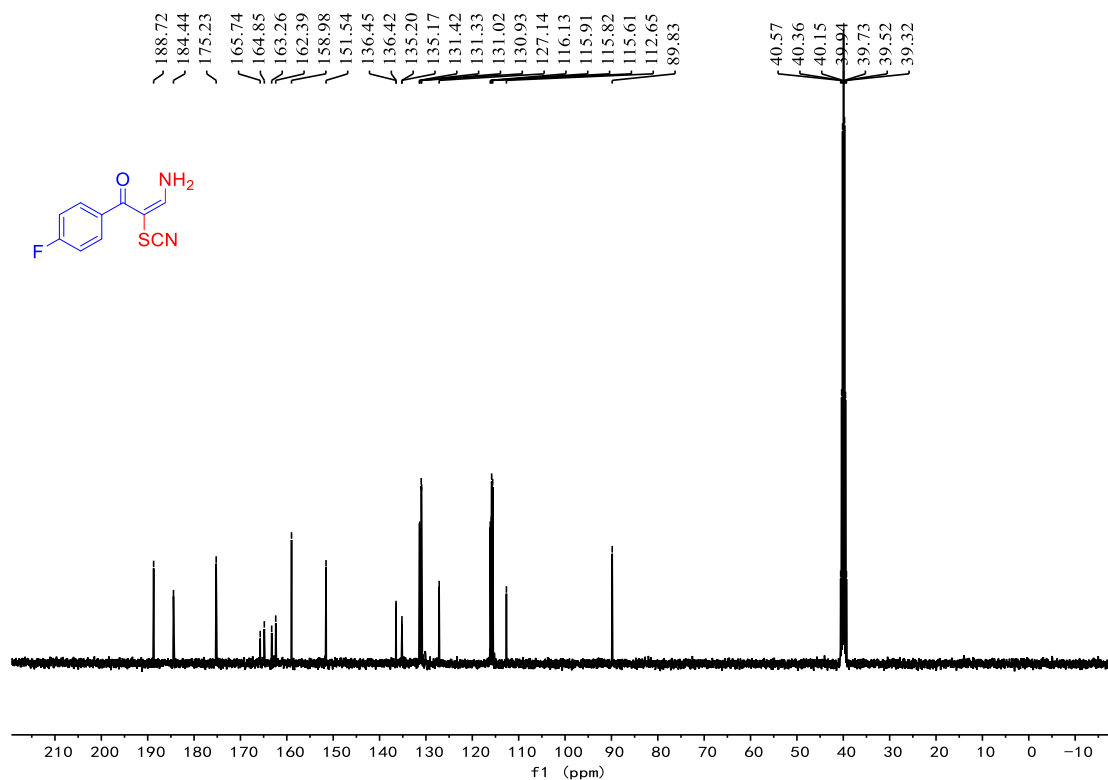

$^{19}\text{F}$  NMR (376 MHz,  $\text{DMSO-}d_6$ ) of compound **3g**

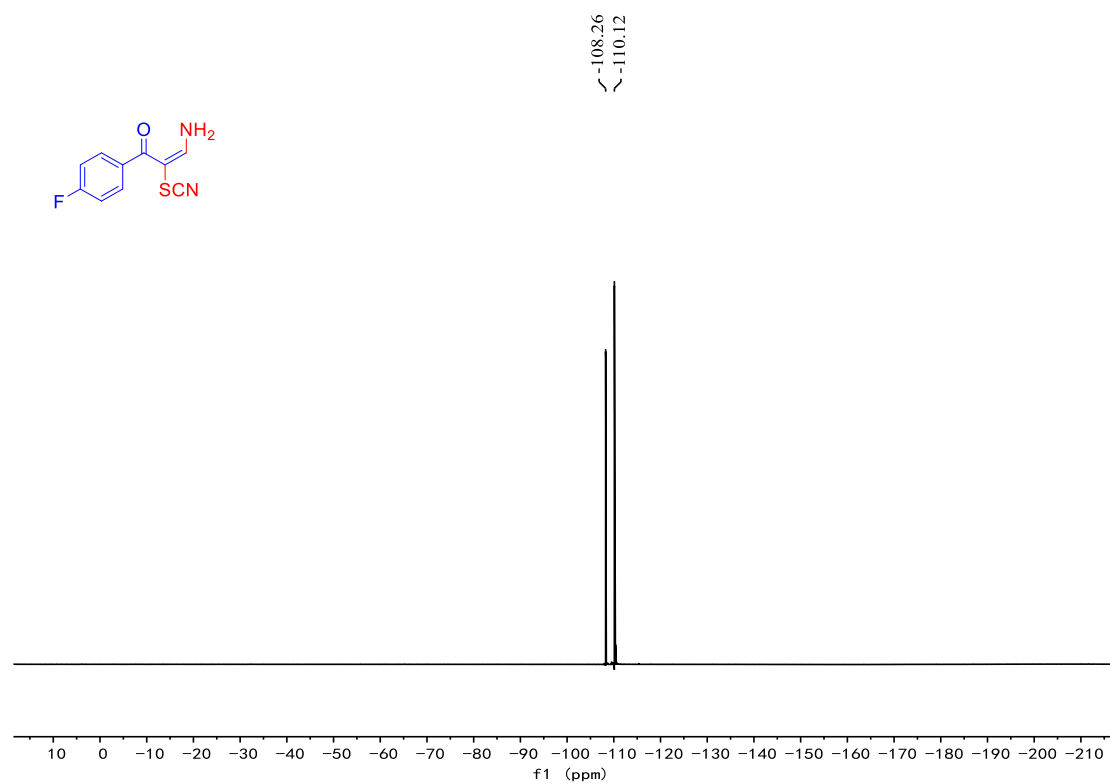

$^1\text{H}$  NMR (400 MHz,  $\text{DMSO-}d_6$ ) of compound **3h**

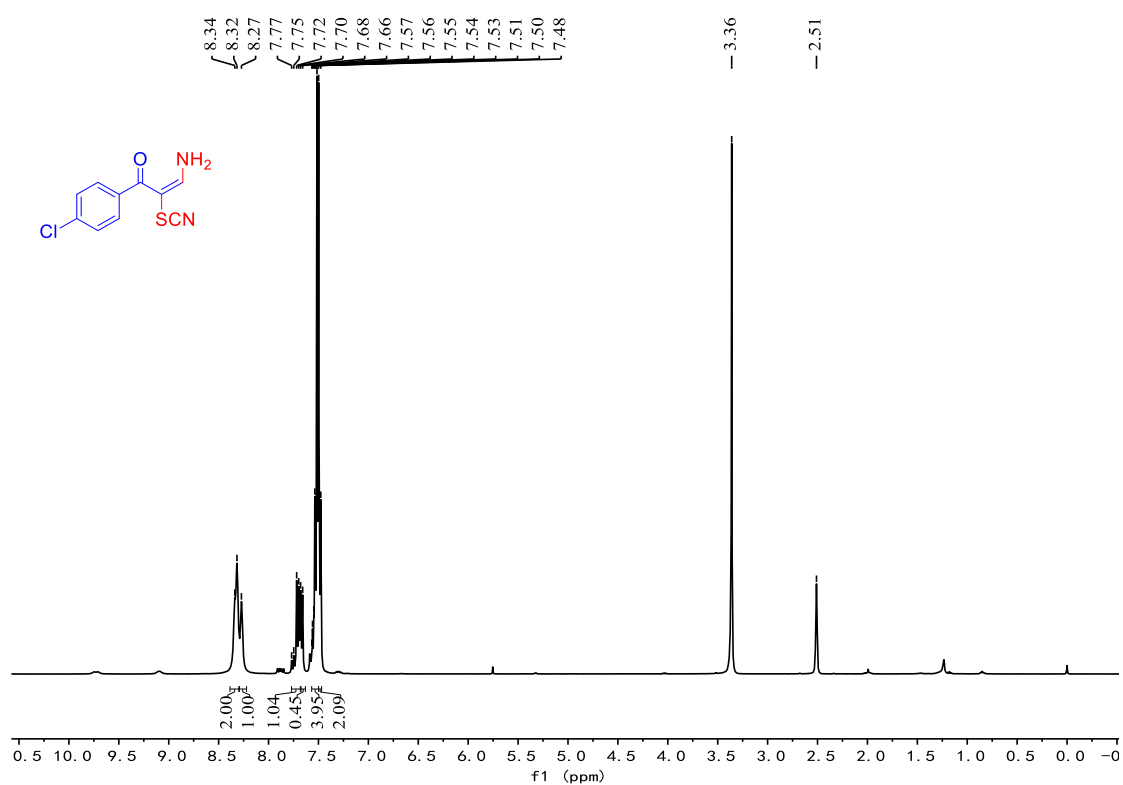

$^{13}\text{C}$  NMR (101 MHz,  $\text{DMSO-}d_6$ ) of compound **3h**

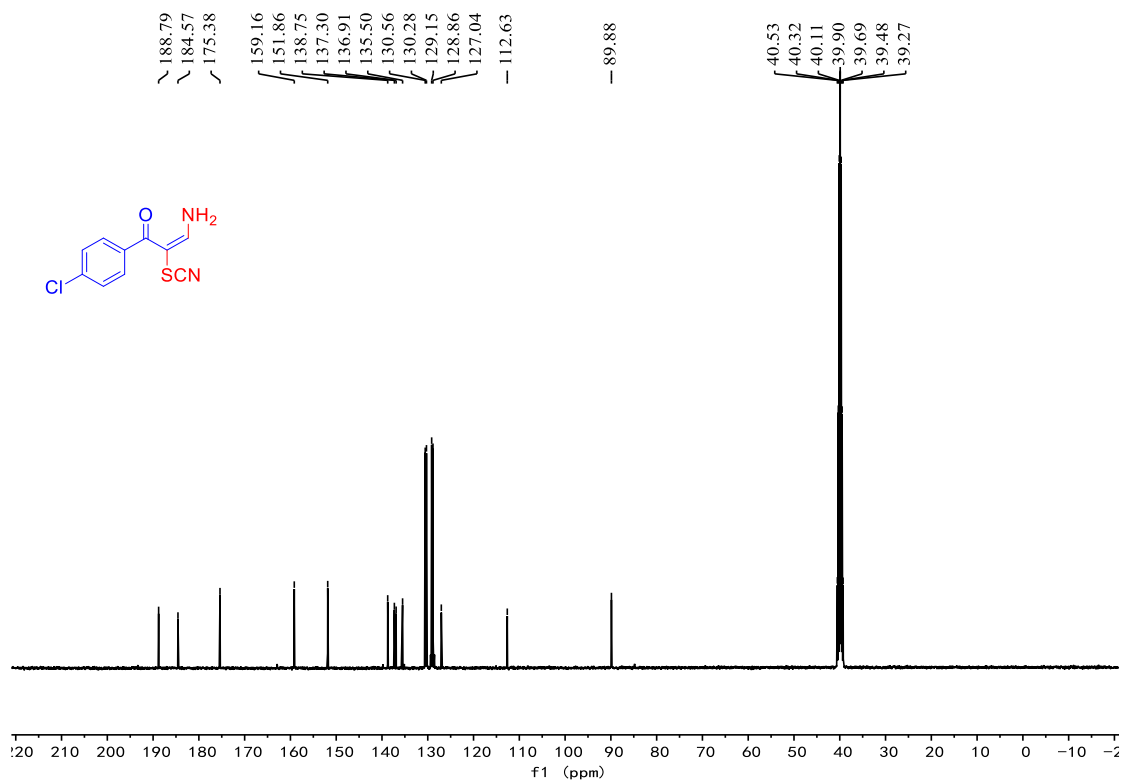

$^1\text{H}$  NMR (400 MHz,  $\text{DMSO-}d_6$ ) of compound **3i**

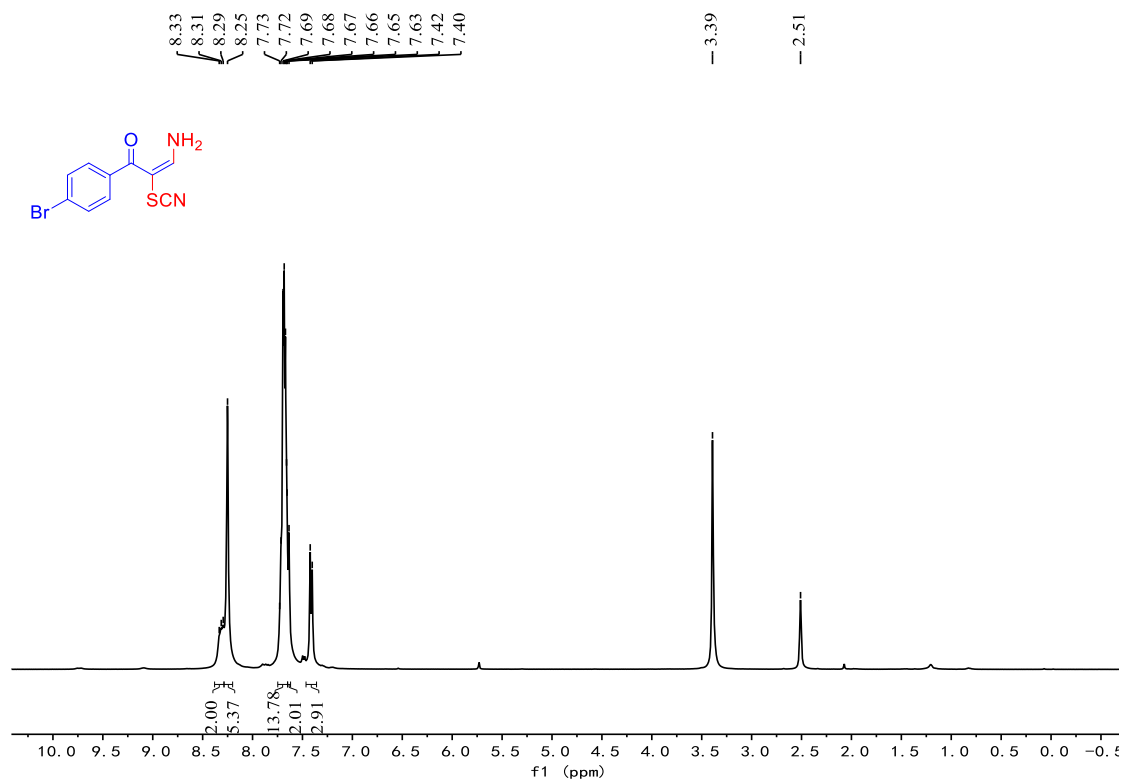

$^{13}\text{C}$  NMR (101 MHz,  $\text{DMSO-}d_6$ ) of compound **3i**

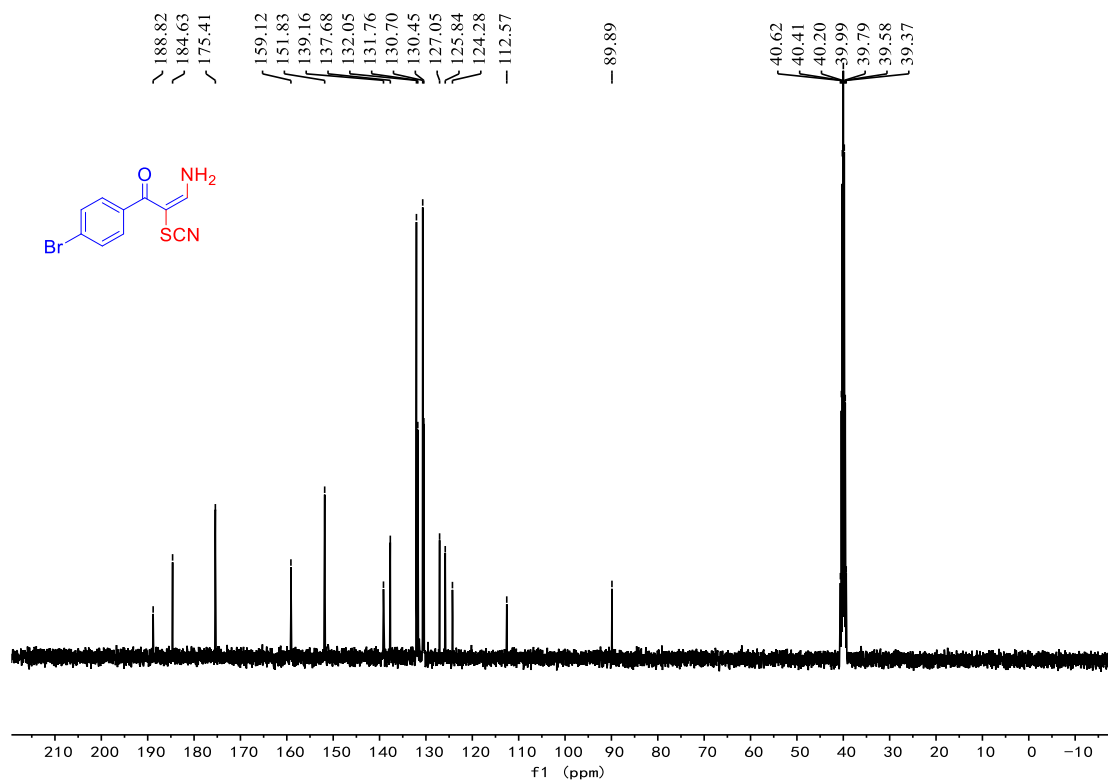

Chemical structure: NC(=S)C(=O)c1ccc(I)cc1

<sup>1</sup>H NMR spectrum (ppm):

- 8.31, 8.29, 8.24, 7.90, 7.88, 7.84, 7.82, 7.71, 7.69, 7.67, 7.66, 7.65, 7.52, 7.50, 7.26, 7.24 (aromatic protons)
- 3.36 (methine proton)
- 2.51 (methyl group)

Integration values (from left to right): 2.00, 1.99, 1.04, 2.98, 2.00, 1.09, 3.02.

Chemical structure of 4-iodobenzaldehyde is shown above the spectrum. The spectrum displays peaks corresponding to the chemical structure, with the following chemical shifts (ppm) labeled above the peaks:

189.06, 184.91, 175.36, 159.10, 151.76, 139.47, 137.92, 137.61, 130.54, 130.34, 129.41, 127.05, 112.57, 99.82, 97.87, 89.85, 40.64, 40.43, 40.22, 40.01, 39.81, 39.60, 39.39.

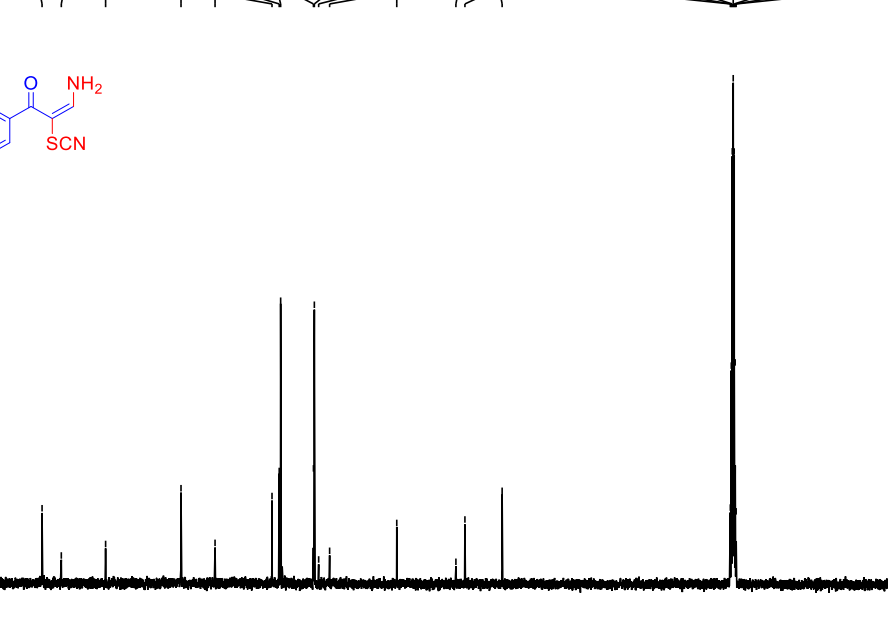

Chemical structure of 4-iodobenzaldehyde is shown above the spectrum. The spectrum displays peaks corresponding to the chemical structure, with the following chemical shifts (ppm) labeled above the peaks:

189.06, 184.91, 175.36, 159.10, 151.76, 139.47, 137.92, 137.61, 130.54, 130.34, 129.41, 127.05, 112.57, 99.82, 97.87, 89.85, 40.64, 40.43, 40.22, 40.01, 39.81, 39.60, 39.39.



$^1\text{H}$  NMR (400 MHz,  $\text{DMSO-}d_6$ ) of compound **3k**

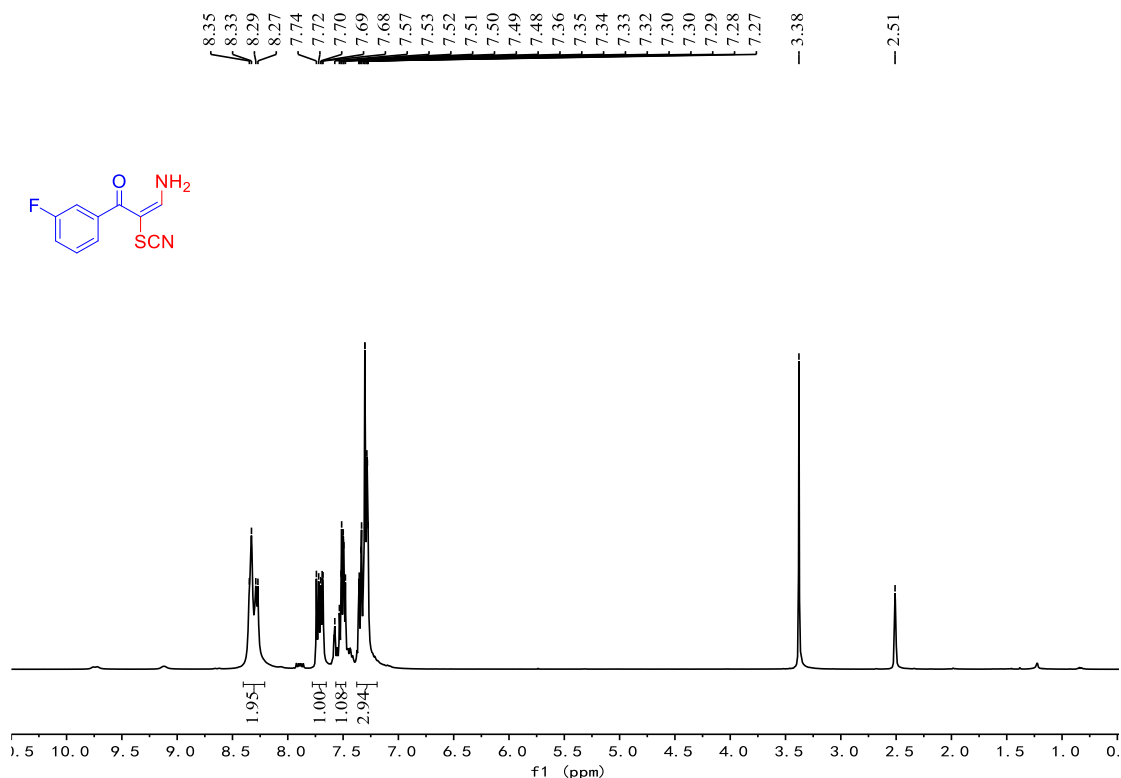

$^{13}\text{C}$  NMR (101 MHz,  $\text{DMSO-}d_6$ ) of compound **3k**

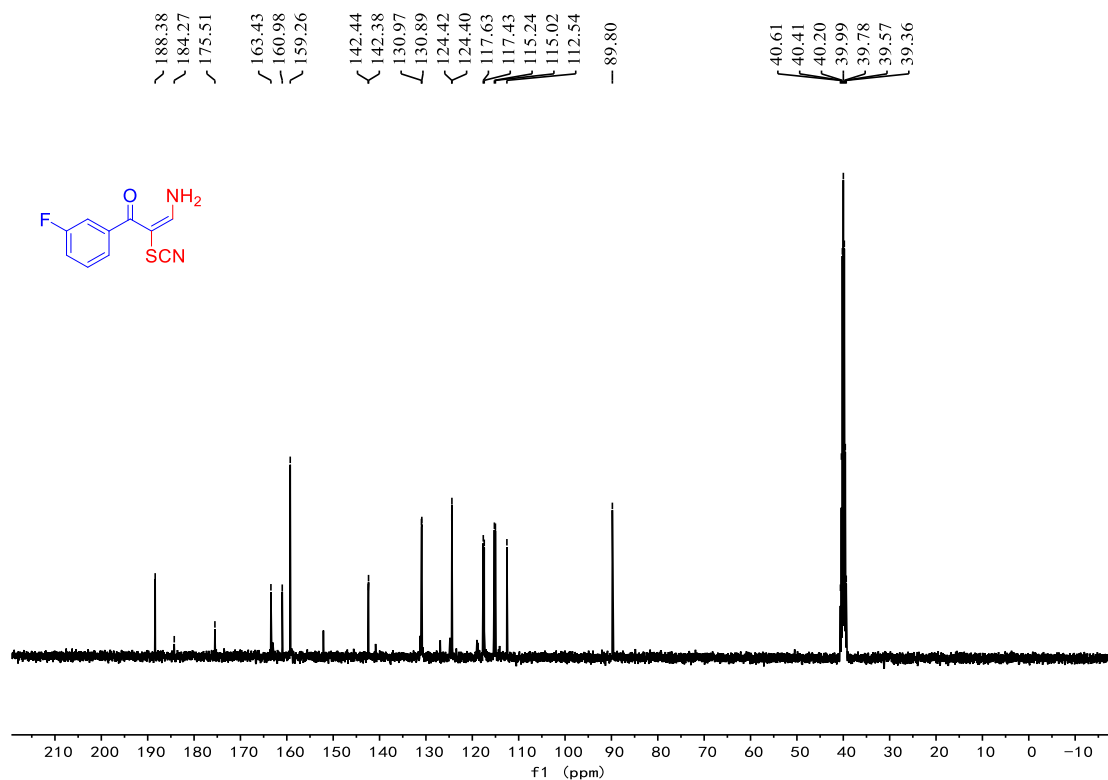

$^{19}\text{F}$  NMR (376 MHz,  $\text{DMSO-}d_6$ ) of compound **3k**

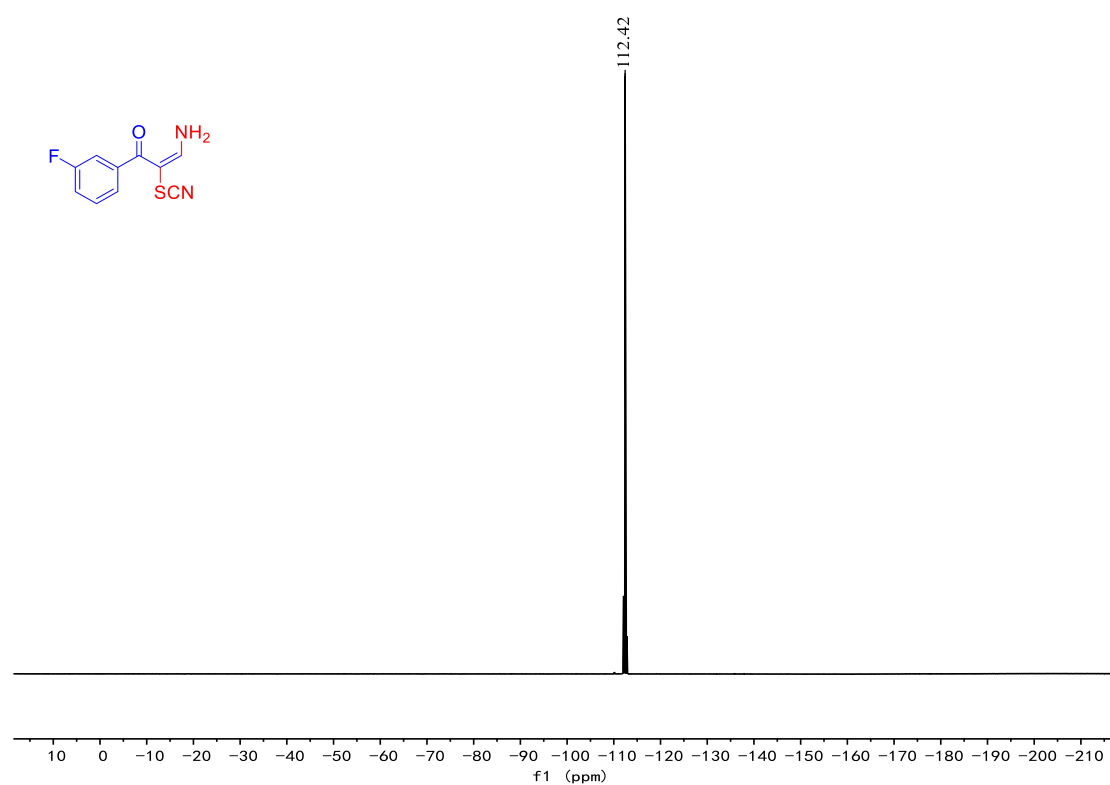

$^1\text{H}$  NMR (400 MHz,  $\text{DMSO-}d_6$ ) of compound **31**

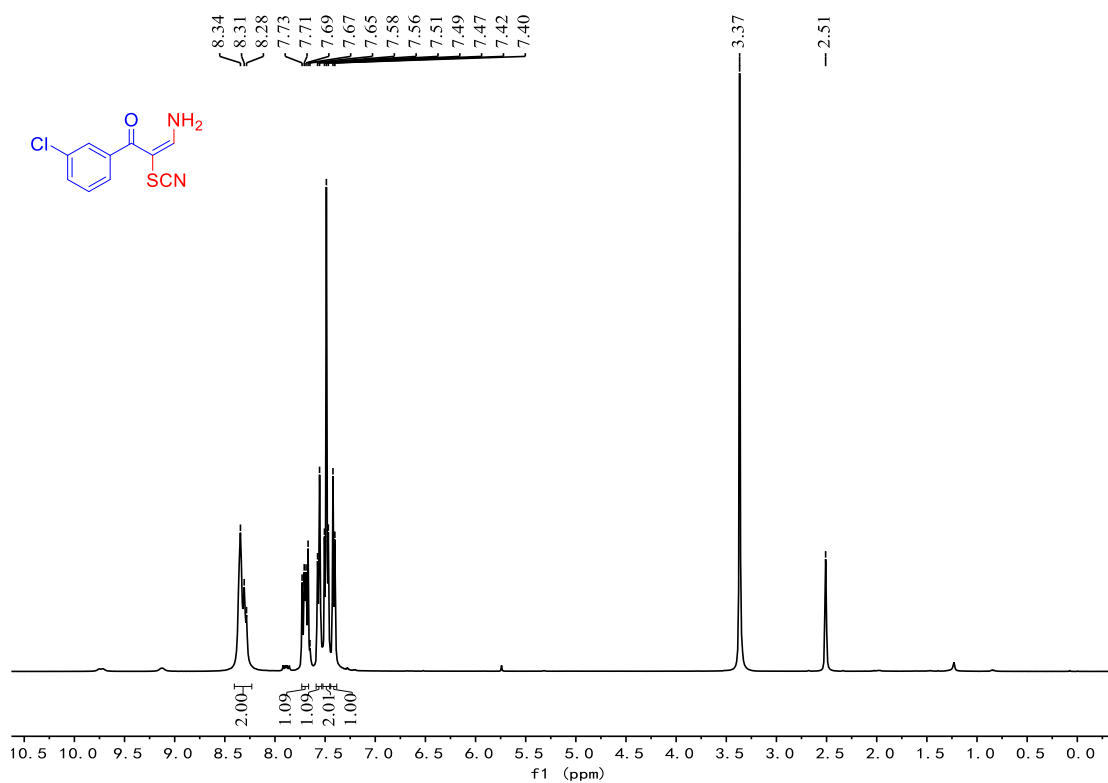

$^{13}\text{C}$  NMR (101 MHz,  $\text{DMSO-}d_6$ ) of compound **31**

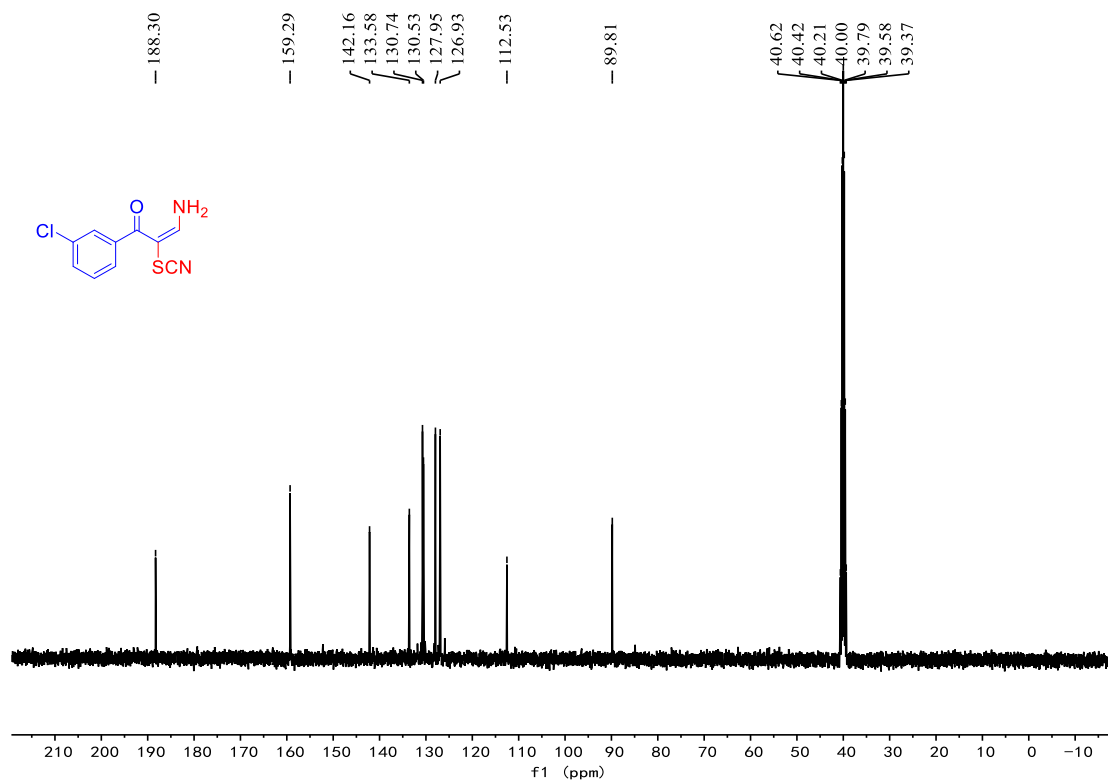

$^1\text{H}$  NMR (400 MHz,  $\text{DMSO-}d_6$ ) of compound **3m**

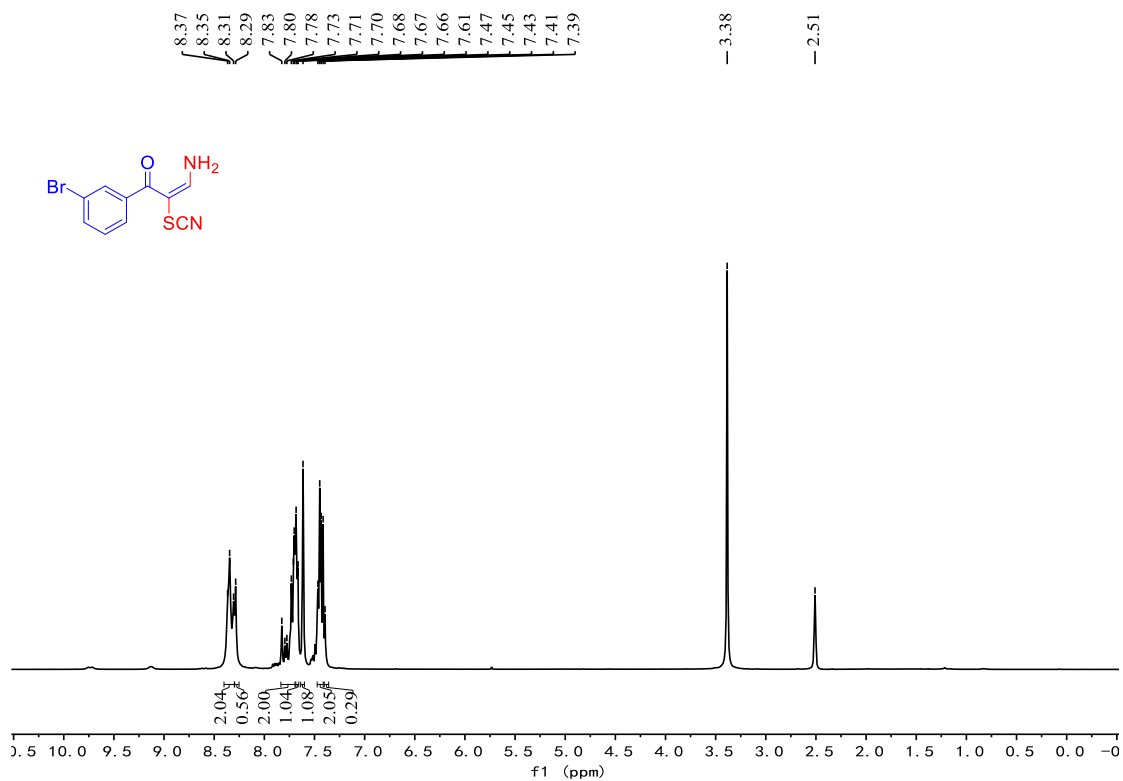

$^{13}\text{C}$  NMR (101 MHz,  $\text{DMSO-}d_6$ ) of compound **3m**

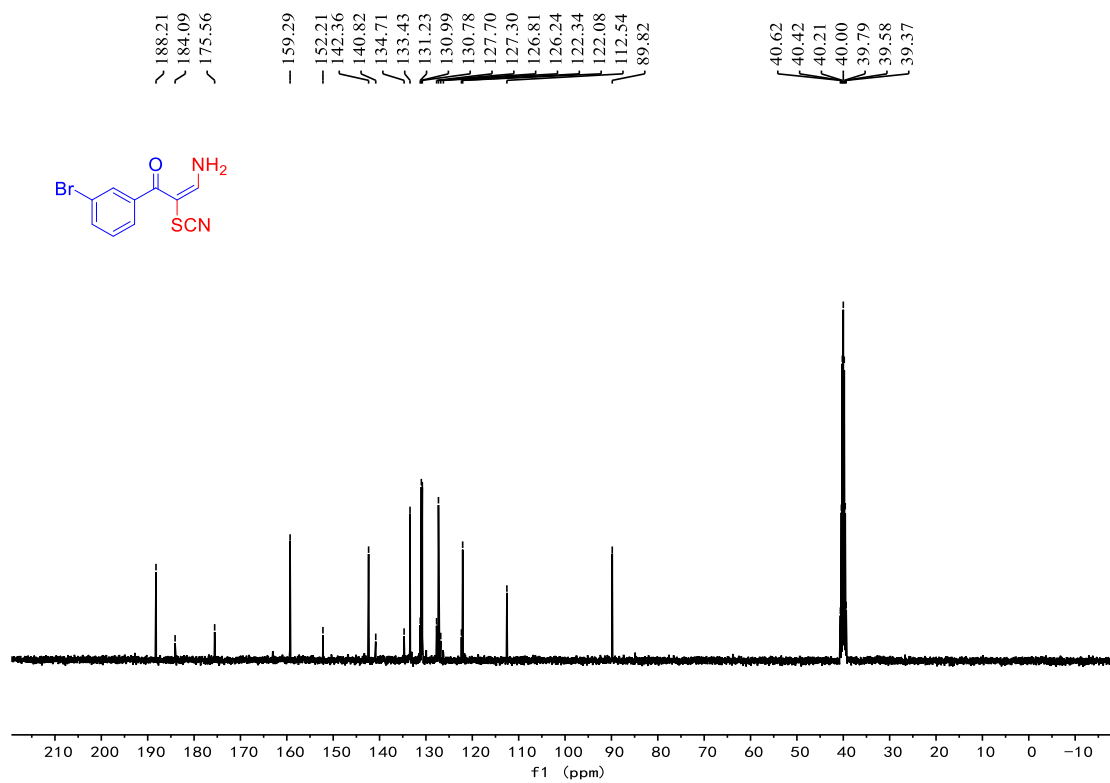

$^1\text{H}$  NMR (400 MHz,  $\text{DMSO-}d_6$ ) of compound **3n**

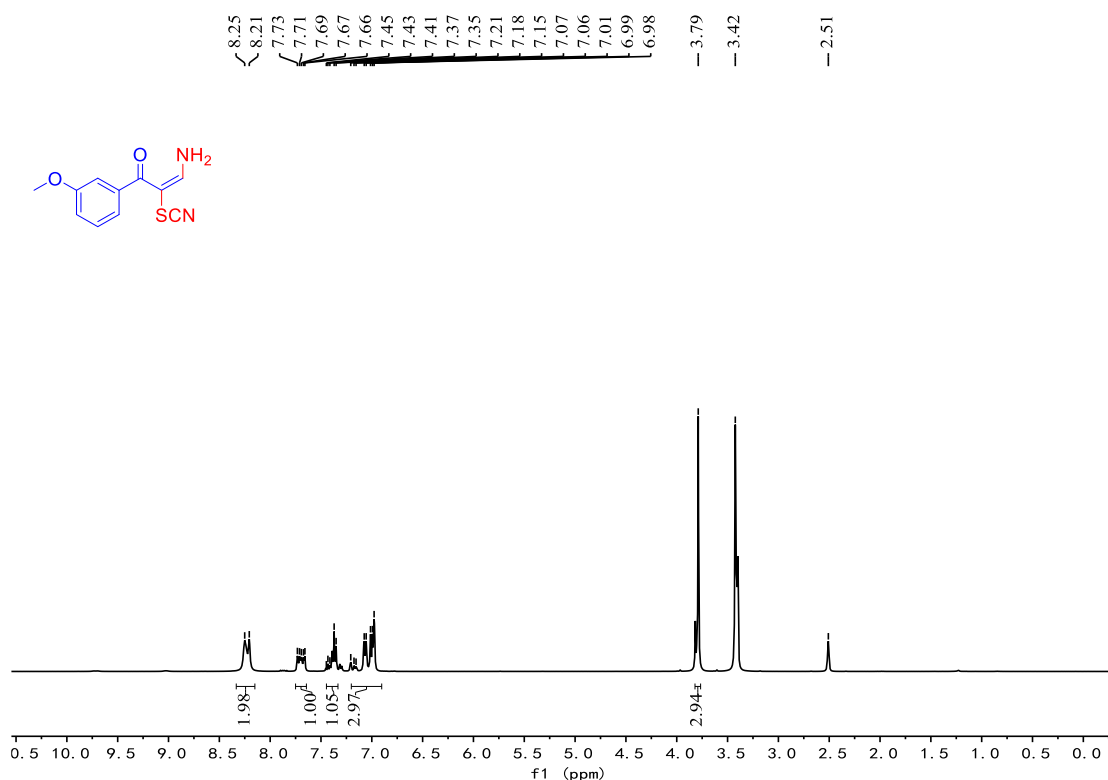

$^{13}\text{C}$  NMR (101 MHz,  $\text{DMSO-}d_6$ ) of compound **3n**

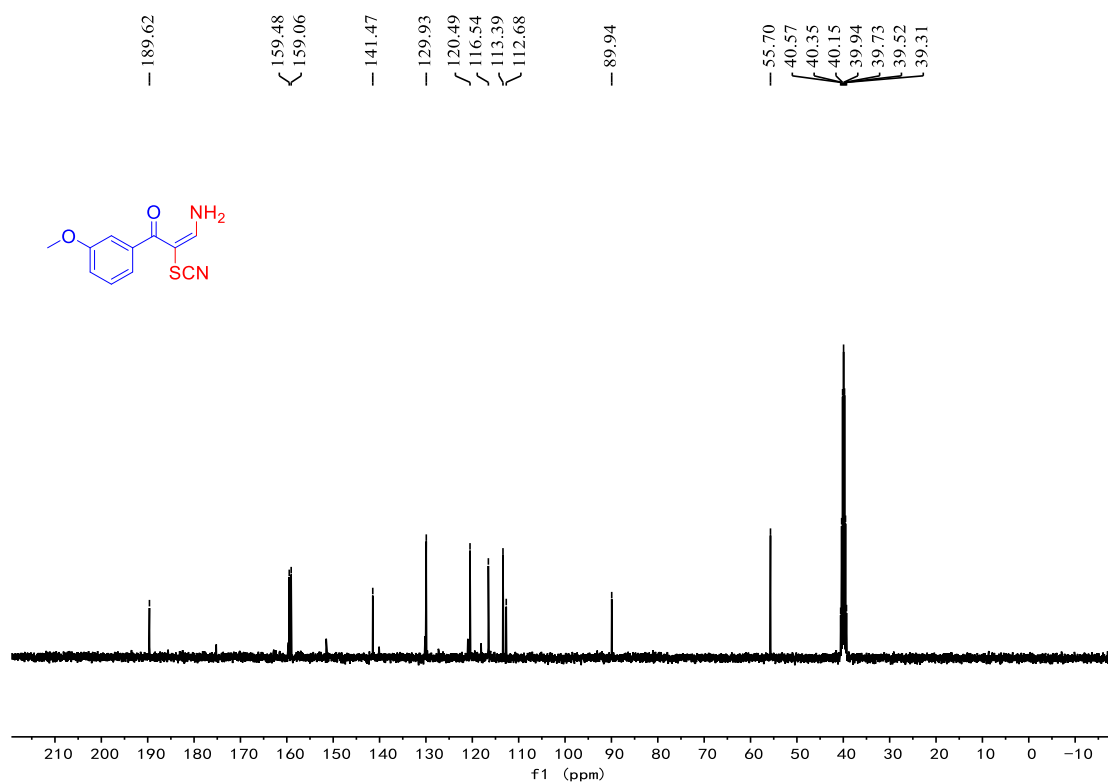

$^1\text{H}$  NMR (400 MHz,  $\text{DMSO}-d_6$ ) of compound **3o**

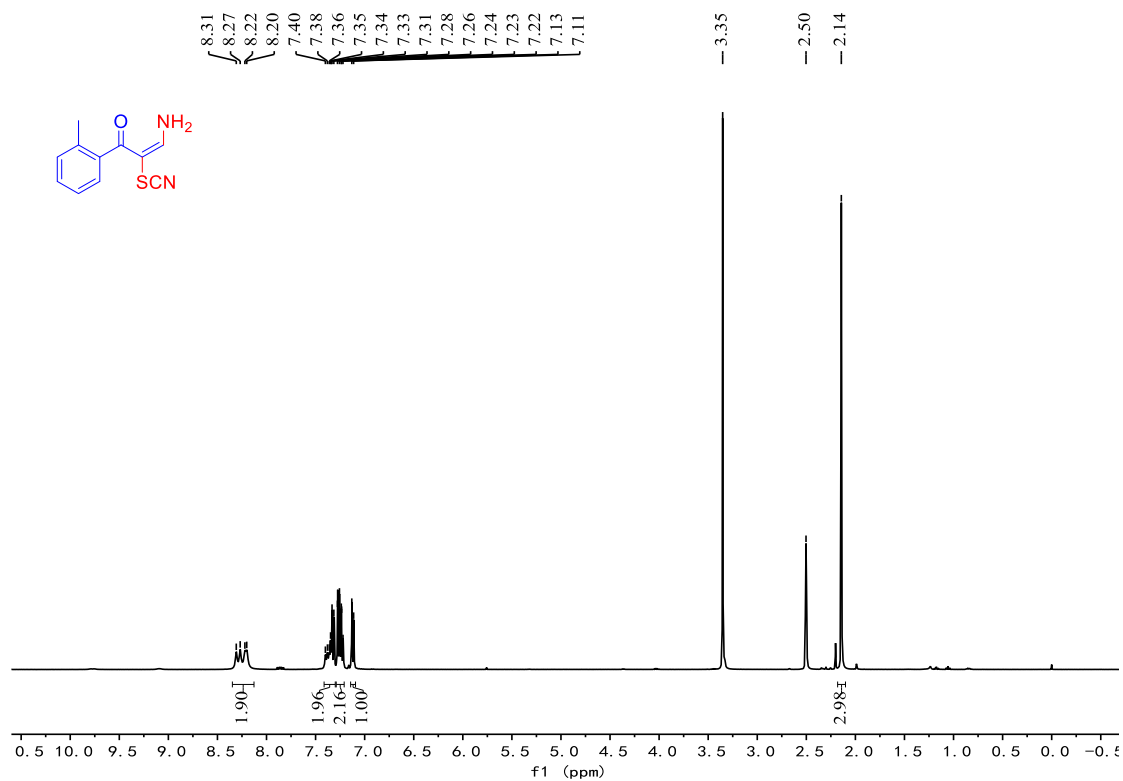

$^{13}\text{C}$  NMR (101 MHz,  $\text{DMSO}-d_6$ ) of compound **3o**

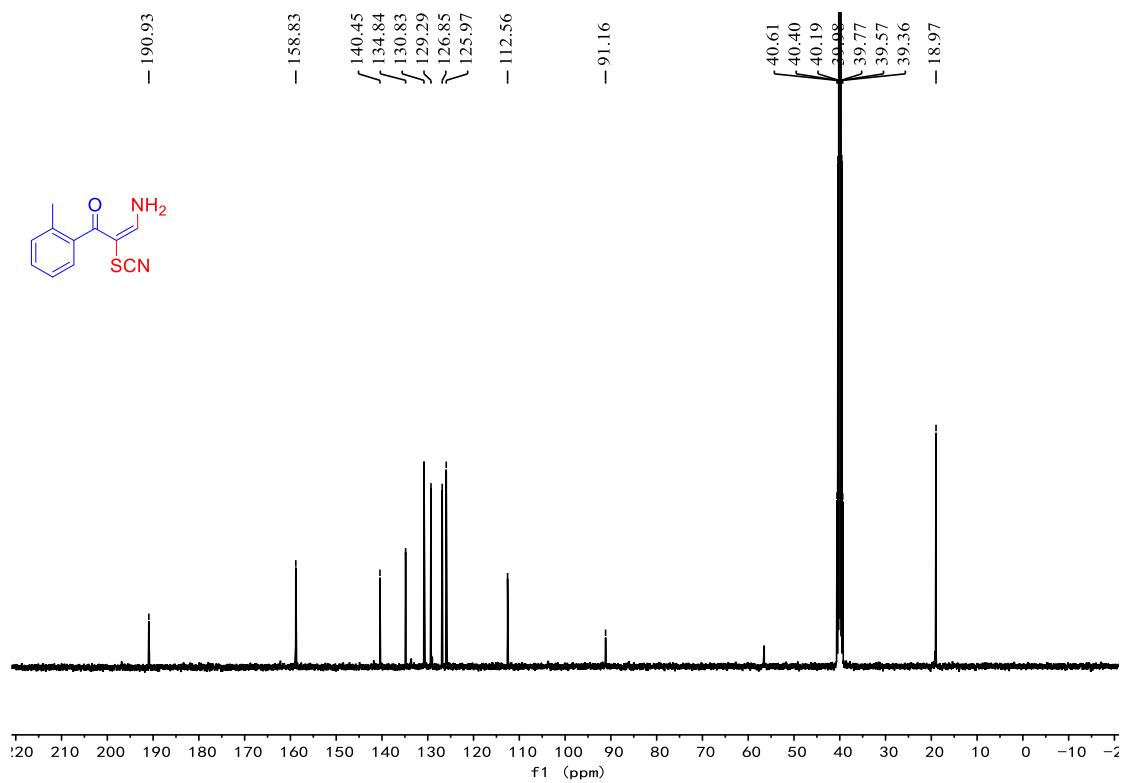

$^1\text{H}$  NMR (400 MHz,  $\text{DMSO-}d_6$ ) of compound **3p**

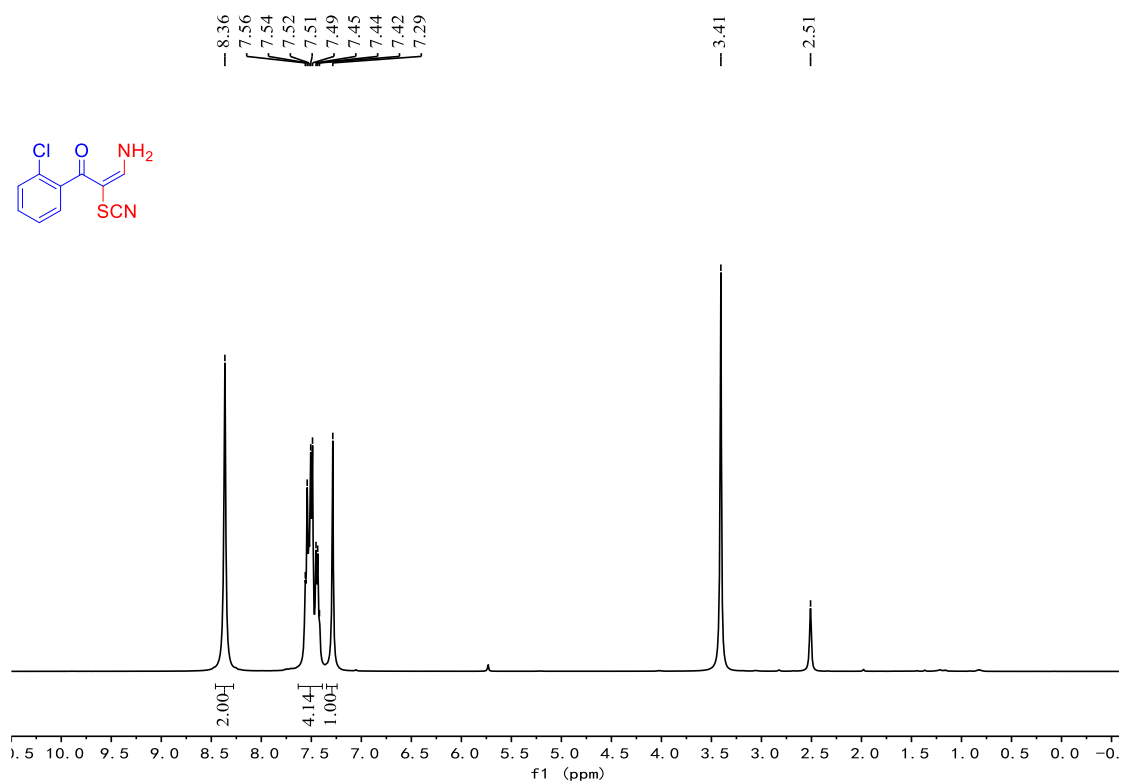

$^{13}\text{C}$  NMR (101 MHz,  $\text{DMSO-}d_6$ ) of compound **3p**

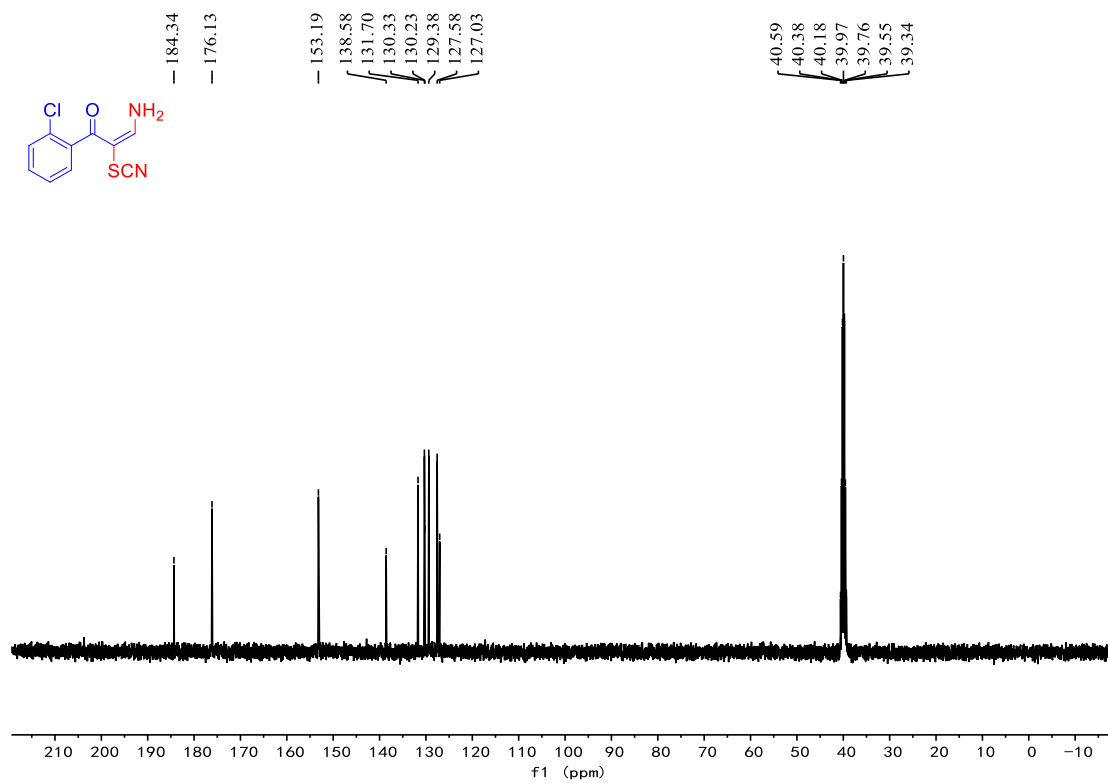

$^1\text{H}$  NMR (400 MHz,  $\text{DMSO}-d_6$ ) of compound **3q**

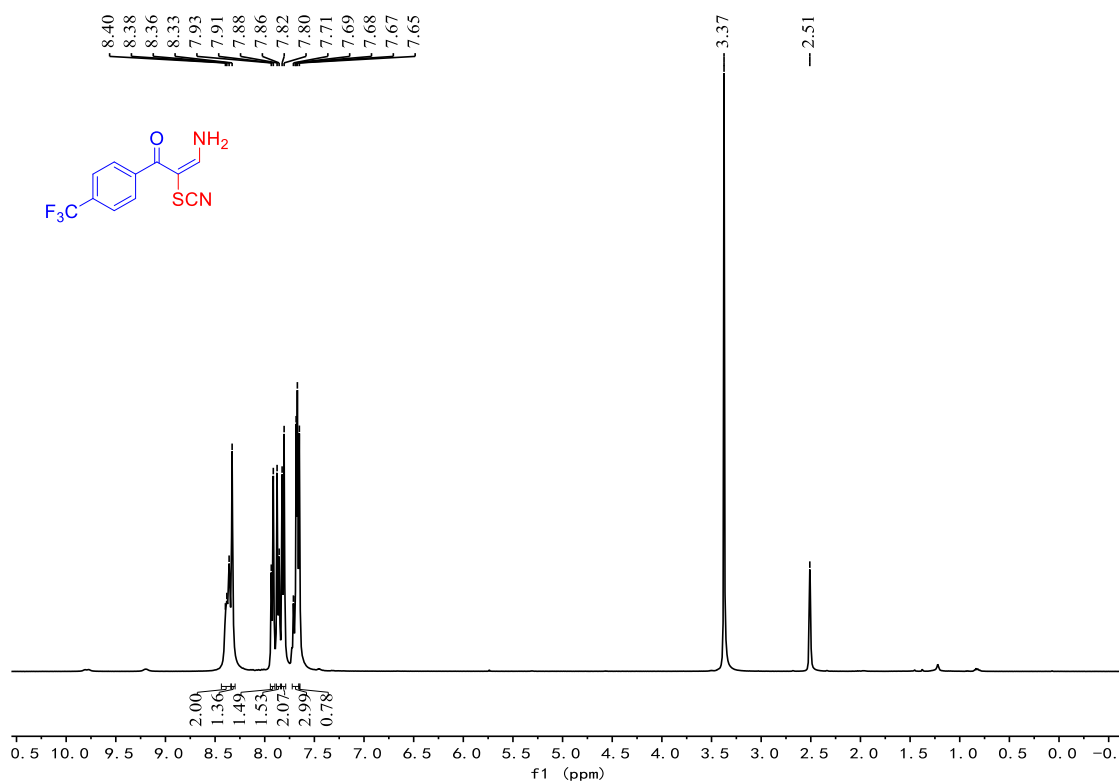

$^{13}\text{C}$  NMR (101 MHz,  $\text{DMSO}-d_6$ ) of compound **3q**

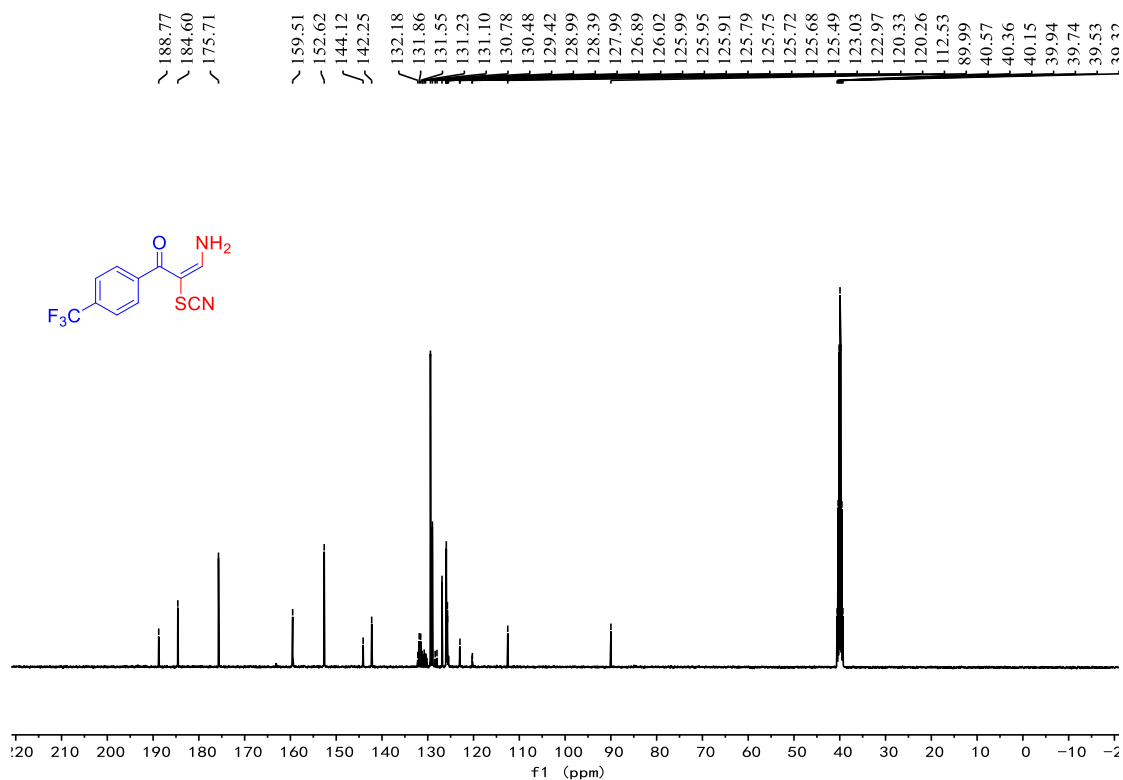



$^{19}\text{F}$  NMR (376 MHz,  $\text{DMSO-}d_6$ ) of compound **3q**

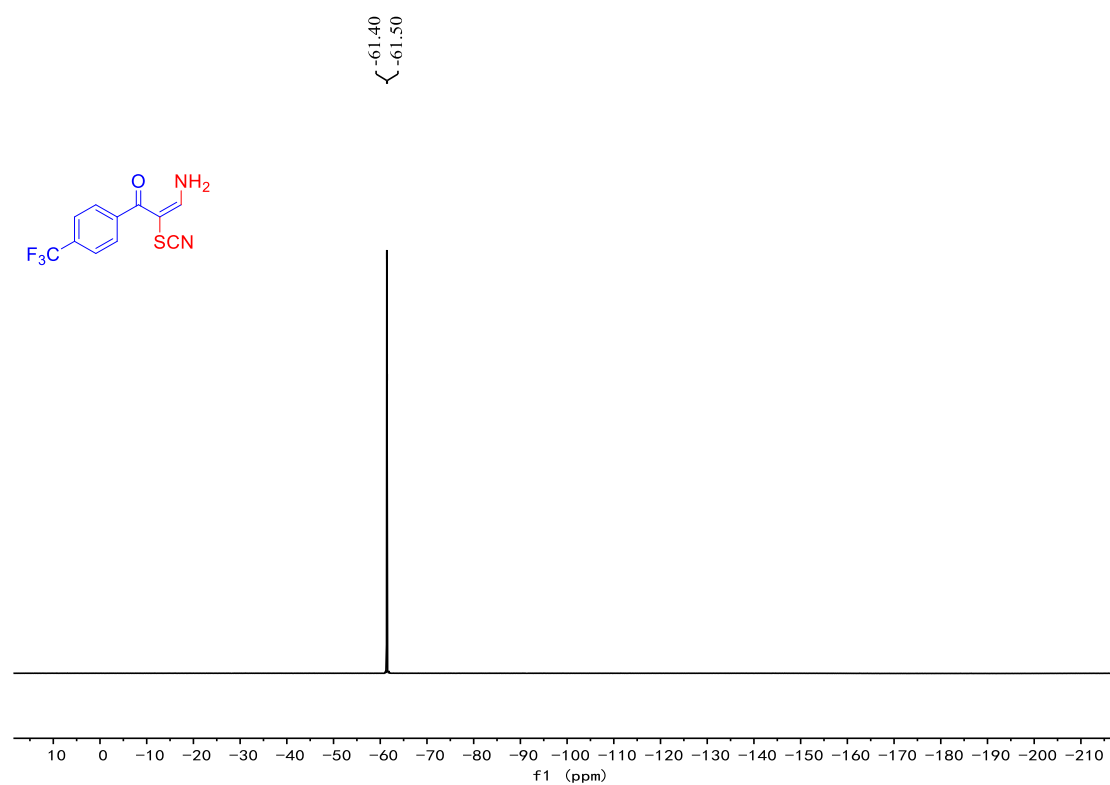

$^1\text{H}$  NMR (400 MHz,  $\text{DMSO-}d_6$ ) of compound **3r**

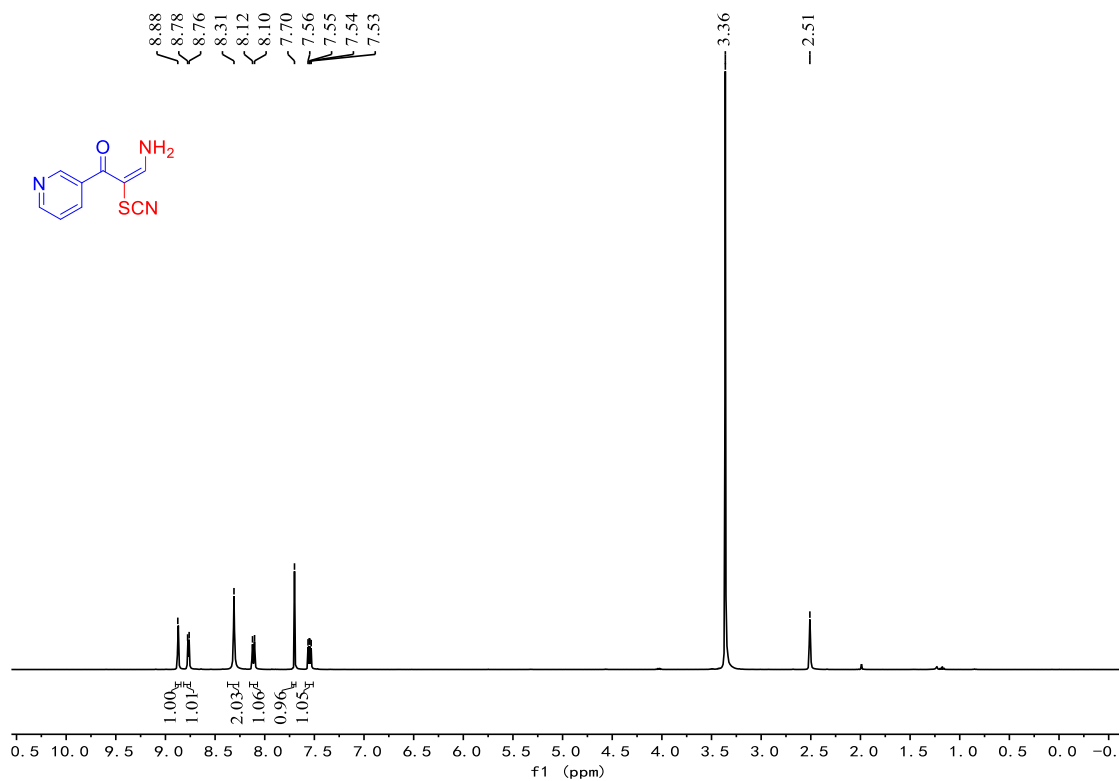

$^{13}\text{C}$  NMR (101 MHz,  $\text{DMSO-}d_6$ ) of compound **3r**

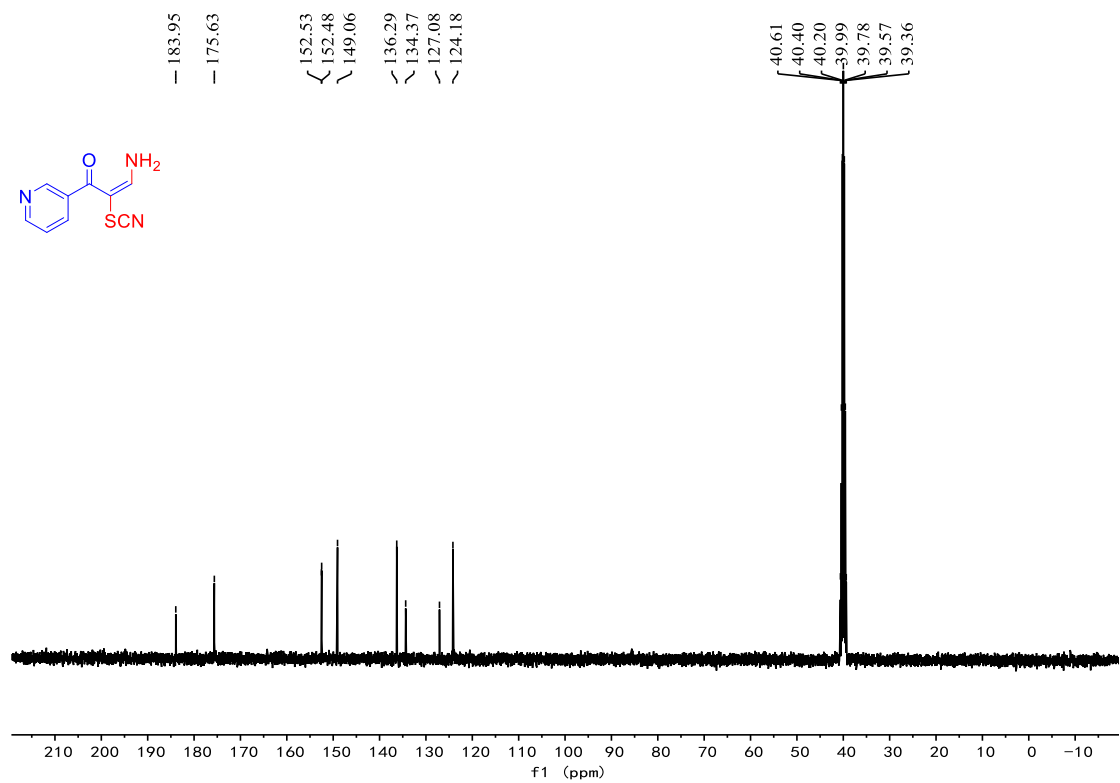

$^1\text{H}$  NMR (400 MHz, DMSO- $d_6$ ) of compound **3s**

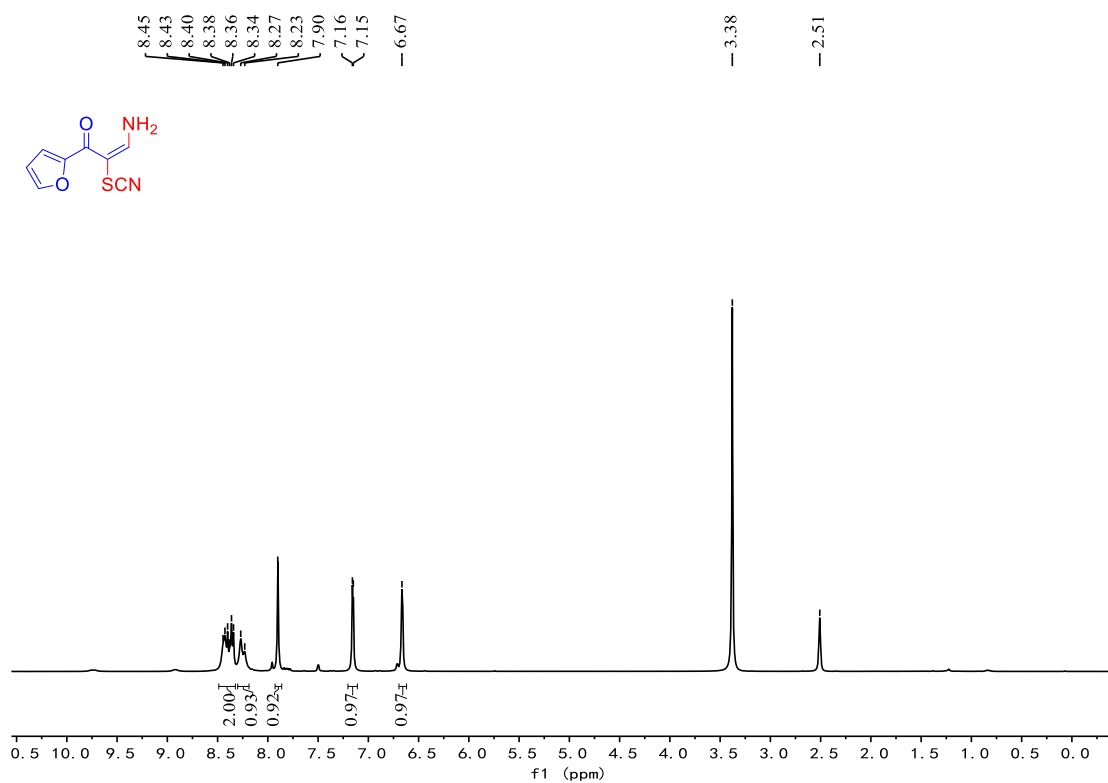

$^{13}\text{C}$  NMR (101 MHz, DMSO- $d_6$ ) of compound **3s**

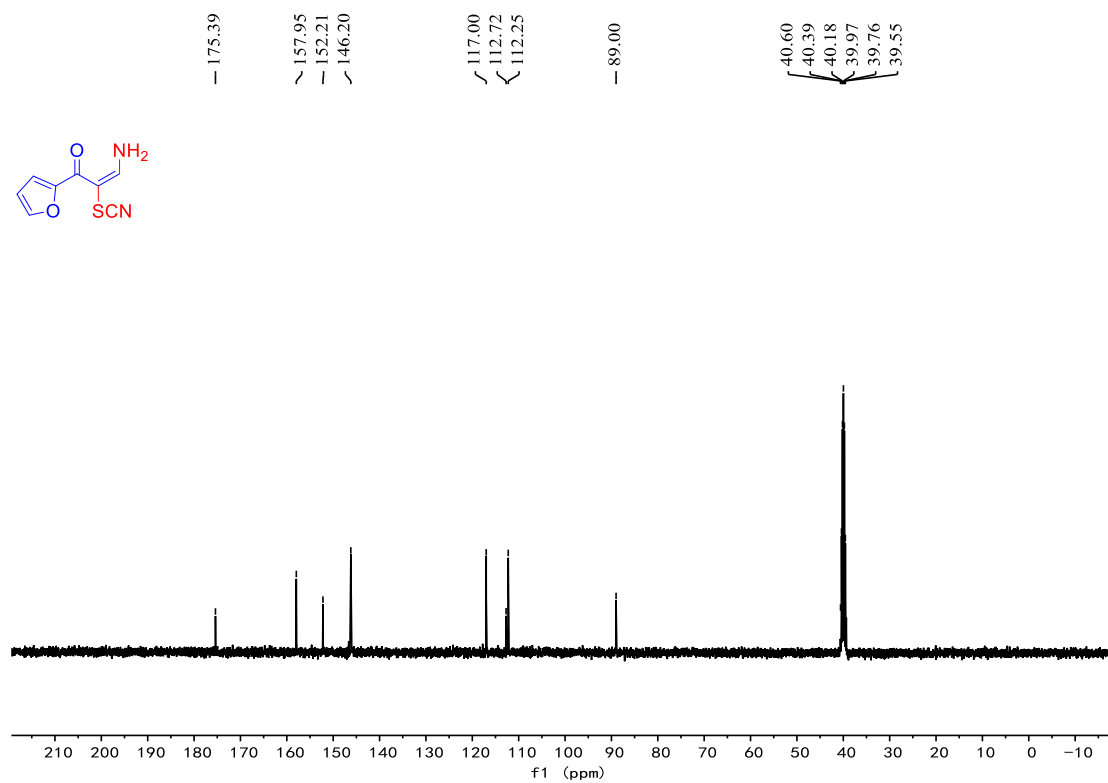

$^1\text{H}$  NMR (400 MHz,  $\text{DMSO}-d_6$ ) of compound **3t**

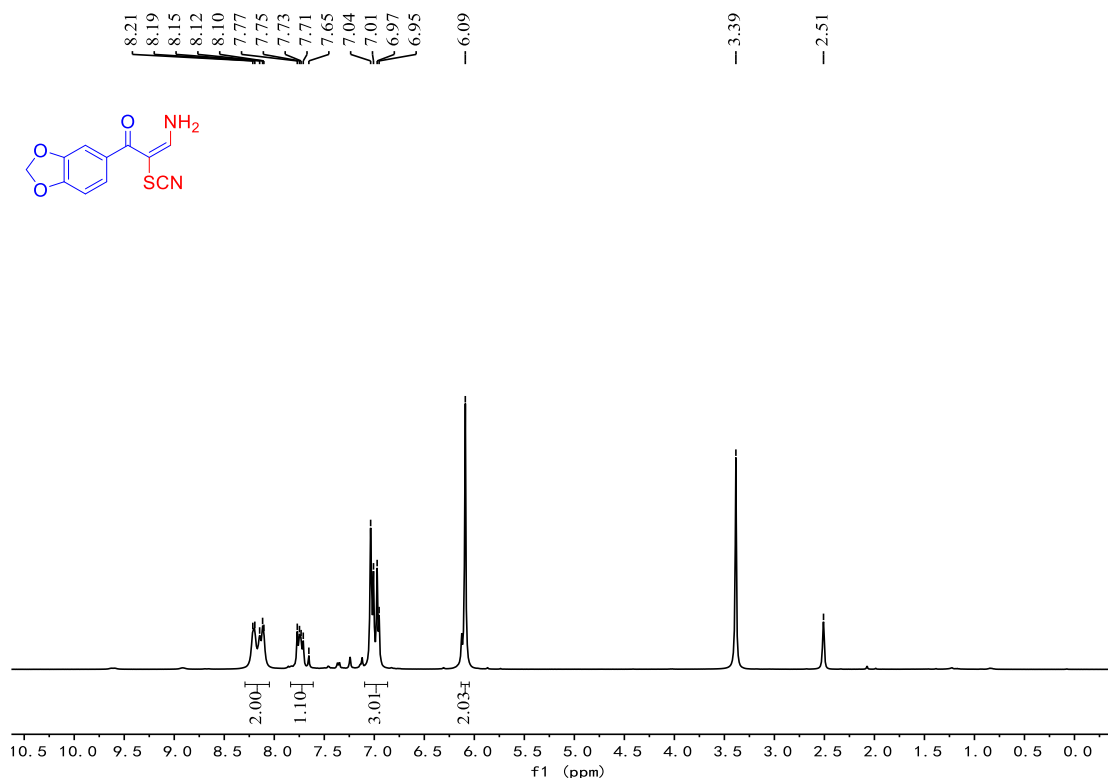

$^{13}\text{C}$  NMR (101 MHz,  $\text{DMSO}-d_6$ ) of compound **3t**

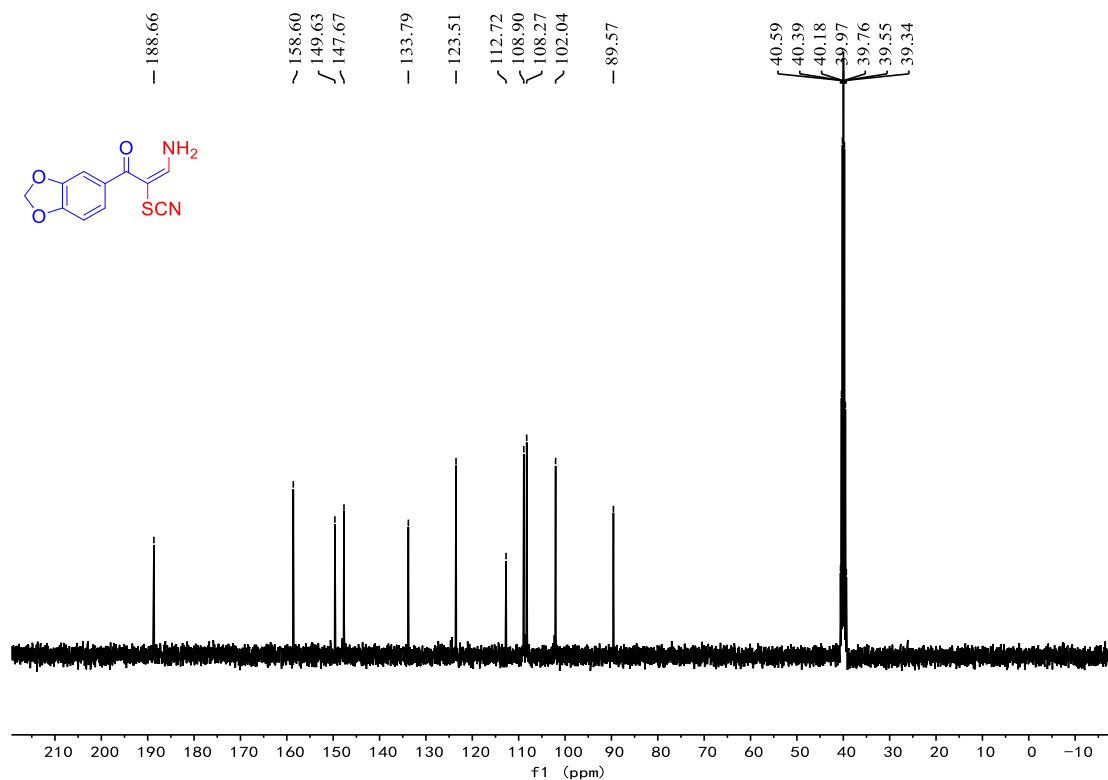

$^1\text{H}$  NMR (400 MHz,  $\text{DMSO-}d_6$ ) of compound **3u**

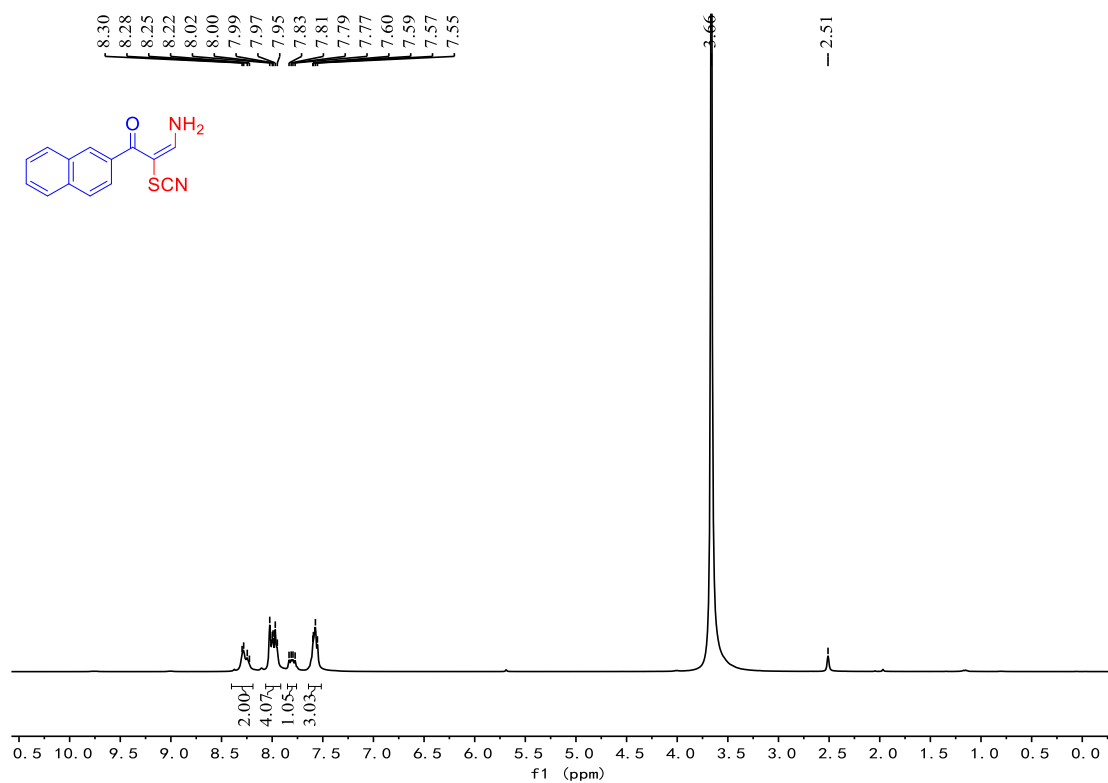

$^{13}\text{C}$  NMR (101 MHz,  $\text{DMSO-}d_6$ ) of compound **3u**

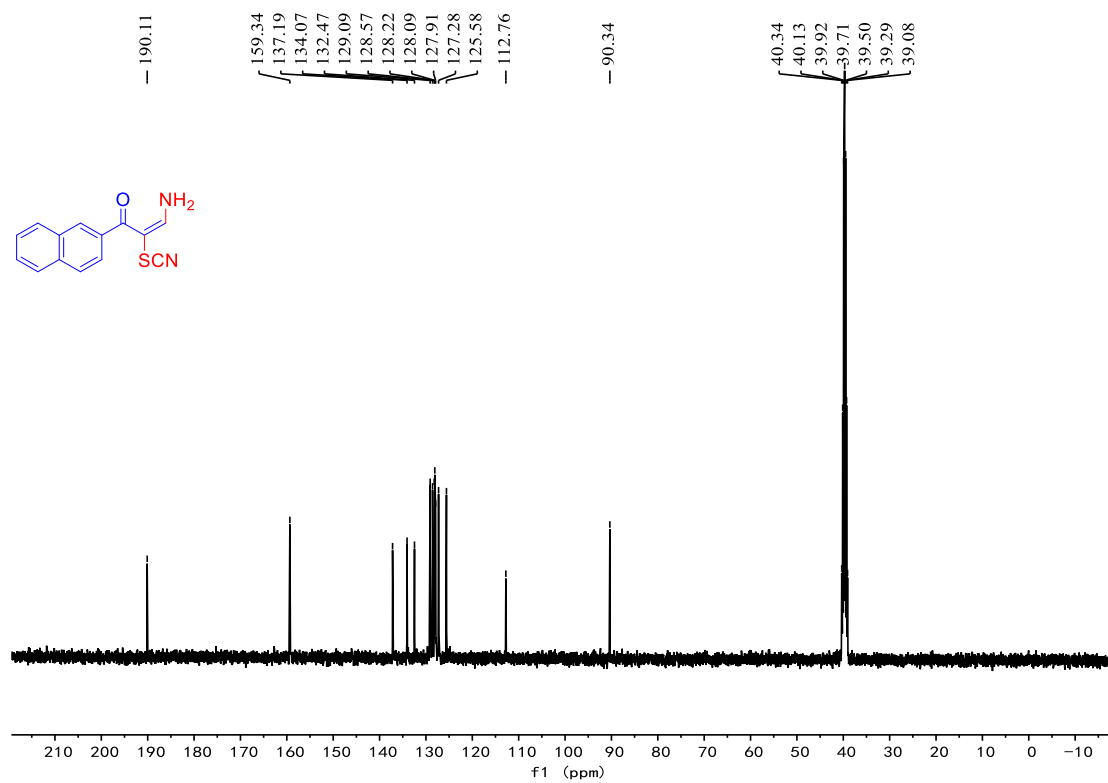

$^1\text{H}$  NMR (400 MHz,  $\text{DMSO}-d_6$ ) of compound **3v**

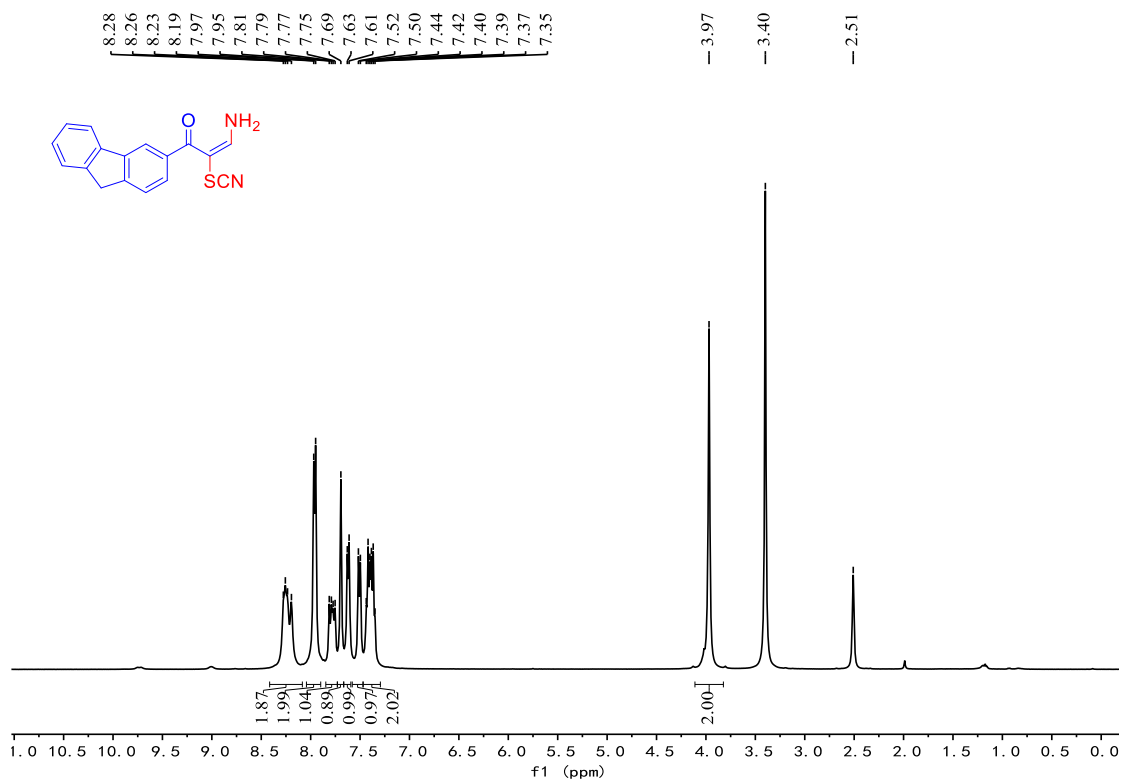

$^{13}\text{C}$  NMR (101 MHz,  $\text{DMSO}-d_6$ ) of compound **3v**

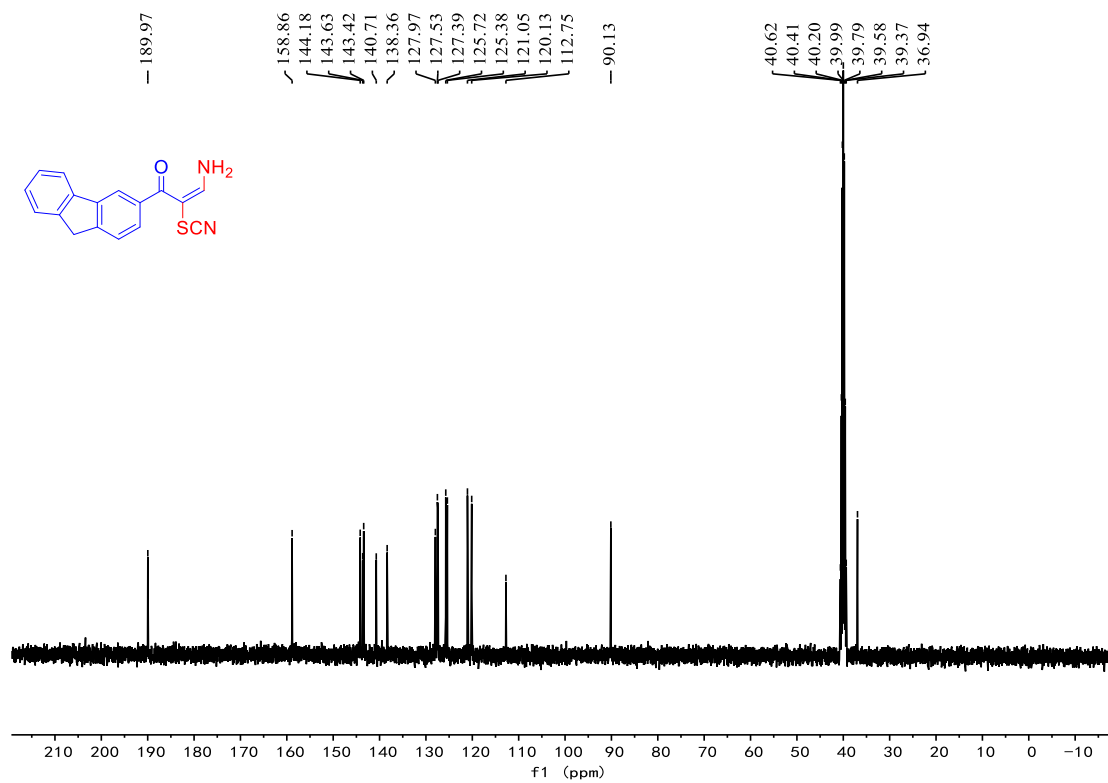

Supplement: d0gc03590d1.pdf [file d0gc03590d1.pdf]
